# Supplementary material for: The use of tyrosinases in a chemoenzymatic cascade as a peptide ligation strategy
Source: Royal Society of Chemistry journal article supplement (doi:10.1039/d2cb00237j), 2022-12-12
Supplement: d2cb00237j1.pdf [file d2cb00237j1.pdf]

Supporting Information

**The use of tyrosinases in a chemoenzymatic cascade as a peptide ligation strategy**

Yeke Ni, Yu Wang, Alethea B. Tabor, John M. Ward and Helen C. Hailes\*

## Table of Contents

|                                                                 |           |
|-----------------------------------------------------------------|-----------|
| <b>1. General Methods.....</b>                                  | <b>3</b>  |
| <b>2. Protein Expression and Cell Lysates Preparation .....</b> | <b>4</b>  |
| <b>3. HPLC Methods .....</b>                                    | <b>6</b>  |
| <b>4. General Synthetic Procedures .....</b>                    | <b>7</b>  |
| <b>5. Procedures and Characterization .....</b>                 | <b>8</b>  |
| <b>6. Molecular Docking Figures .....</b>                       | <b>27</b> |
| <b>7. Abbreviation .....</b>                                    | <b>29</b> |
| <b>8. References.....</b>                                       | <b>30</b> |

## 1. General Methods

**Chemicals:** All chemicals were purchased from commercial suppliers (Sigma-Aldrich, Acros Organics, Alfa Aesar etc.) and used as received. All chemicals were purchased in the highest purity available. Thin layer chromatography (TLC) was carried out with Merck TLC silica gel 60 F254 pre-coated plates, or Geduran® Si 60 silica (43-60  $\mu\text{m}$ ) and products were visualised using UV light (254, 360 nm), potassium permanganate, phosphomolybdic acid, or ninhydrin staining solutions.

**Nuclear Magnetic Resonance (NMR) spectroscopy:**  $^1\text{H}$  and  $^{13}\text{C}$  NMR spectra were recorded using Bruker Advance 500, 600 and 700 MHz spectrometers at 298 K. The chemical shifts (in ppm) were determined relative to tetramethylsilane (TMS) set at 0 ppm and referenced to residual, protonated NMR solvents. Coupling constants in  $^1\text{H}$  NMR spectra were defined as  $J$  and measured in Hertz (Hz), and are described as singlet (s), doublet (d), triplet (t), doublet of doublets (dd) etc.

**Infrared spectra:** Infrared spectra were recorded on a Perkin Elmer Spectrum 100 FTIR spectrometer.

**Liquid chromatography–mass spectrometry (LC-MS):** LC-MS was performed on an Agilent 1100 Series System with a Finnigan LTQ mass spectrometer. An ACE 5 C18 reverse phase column (50 mm  $\times$  2.1 mm, 5  $\mu\text{m}$ ) was adopted with a mobile phase of eluent A ( $\text{H}_2\text{O}$  with 0.1% (v/v) formic acid) and eluent B (acetonitrile) over 5 min with a flow rate of 0.2 mL/min, following a gradient of A/B = 95%/5% to 5%/95% at 0-4 min, A/B = 5%/95% to 95%/5% at 4-4.5 min, A/B = 95%/5% at 4.5-5 min. The sample injection volume was 10  $\mu\text{L}$ . Chemical compounds were measured in a positive ion mode, and the operating conditions of the ESI interface were set to a capillary temperature 300  $^\circ\text{C}$ , capillary voltage 9 V, spray voltage 4 kV, sheath gas 40, auxiliary gas 10, sweep gas 0 arbitrary units.

**High-resolution mass spectrometry (HRMS):** High-Resolution Mass spectrometry experiments were performed by the UCL Chemistry Mass spectrometry service, using EI or CI on a MAT900 or a Waters LCT Premier Q-TOF for ESI.

## 2. Protein Expression and Cell Lysates Preparation

Tyrosinase expression: A *CnTYR* glycerol stock (*E. coli* BL21 (DE3)) was transferred to 5 mL of LB media supplemented with 50 µg/mL kanamycin and grown at 37 °C, 250 rpm overnight. The culture was transferred to a 500 mL baffled shaking flask containing 100 mL TB media supplemented with 50 µg/mL kanamycin and shaken at 37 °C, 250 rpm until OD<sub>600</sub> = 0.9. Enzyme expression was initiated by the addition of 1 mM IPTG (Sigma-Aldrich) and 1 mM CuSO<sub>4</sub> (Sigma-Aldrich) to the culture. The mixture was shaken at 25 °C, 250 rpm for 24 h, and centrifuged at 5000 rpm for 30 min. The cells were stored at -20 °C.

Cell lysates of *CnTYR*: Cell pellets (from 50 mL cultures) were resuspended in 5 mL buffer (KPi, pH 6.0) and lysed by 10 cycles of sonication on ice (10 s on, 10 s off, 12 watts output). The resulting mixture was centrifuged at 4 °C, 5000 rpm for 30 min. The supernatant was stored at -20 °C. The concentration of supernatant protein was measured following the standard Bradford procedure. The samples were duplicated and the average OD<sub>595</sub> were used for cell lysate concentration calculations.

Cell lysates of other TYR enzymes (*RsTYR*, *BmTYR* and *RmTYR*) were generated using previously reported procedures.<sup>1</sup>

### Tyrosinase sequence

**Tyrosinase from *Candidatus Nitrosopumilus salaria* BD31 (*CnTYR*, Gene Bank: GenBank: EIJ65432.1)**  
MVRKNASSLNPIERENFCKAVLTLKNTKIPGHALNRYDEFVAIHFGVTSRERANLPIGDGAHGNSGFLPWHREFL  
CRFEHALKSVDPTVSLPYWDWSSGDTSDTIDIFNDDFMGPAGTVNSGYFSGTGNSFNPNRPWIVHPSLDQTSFGQ  
PPLGSTLIRNSNLLSASTLNLYLMDLGEMARDSLNESTYNAFRSTLEHPPHNHVHGVTVQGHMGWMTSPNDPIFFL  
HHANVDRLWAIEWQRTHPGSSNYTPNATEPYGVHLNDPMWPWQGADTTVTTRHTDSDNASLNTLLPSFSTADLVTP  
NDVLDHIQRCGPYDTPISKPKFEFEKIPKEI I KEI IKDKEKEFGDKNPKEI I KEI IKDKEKEFGDKNPKEI I KEI  
IKDKEKEFGDKNPKEI I KEI IKDKEKEFGDKNPKEI I KEI IKDKEKEFGDKNPKEI I ETGDIKIENNKDVVEILSTP  
STTVSSPKHPKEQSKETLEITNTLFDPLSKINHRLDMLENEIKGTAFIKSTERPNITKRAISKNTSTKKTTRKKT  
KNTKNTMPKKSNTSKRKRISHHHHHH

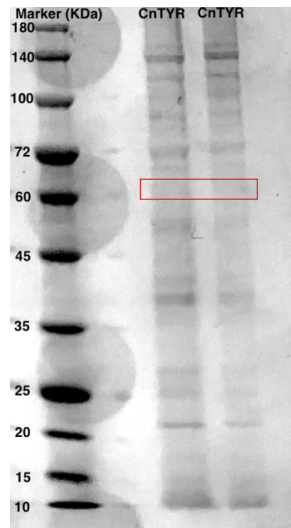

Figure 1. SDS gel for *CnTYR* lysates. From left to right: protein marker (GeneTex), 5  $\mu$ L lysates, 2  $\mu$ L lysates. *CnTYR*: 61.2 KDa.

### 3. HPLC Methods

**Analytical high-performance liquid chromatography (HPLC):** Reaction analysis was carried out on an Agilent 1260 Infinity HPLC system comprising of a G1329B autosampler, a G1311C quaternary pump, a 1260 G1316A column oven and a 1260 G1314F variable wavelength detector, equipped with an ACE 5 C18 reverse phase column (150 mm × 4.6 mm) with acetonitrile and water (0.1% TFA, v/v) as mobile phases. The flow rate was 1 mL/min at 30 °C, and the injection volume was 10 µL. The UV absorbance was measured at 280 nm.

**Method 1:** mobile phase (A: water with 0.1% TFA; B: acetonitrile) in a gradient of A/B = 90%/10% at 0-1 min, A/B = 90%/10% to A/B = 30%/70% at 1-6 min, 100% B at 6-6.5 min, and A/B = 90%/10% at 6.5-10 min.

**Method 2:** mobile phase (A: water with 0.1% TFA; B: acetonitrile) in a gradient of A/B = 90%/10% at 0-1 min, A/B = 90%/10% to A/B = 30%/70% at 1-20 min, A/B = 30%/70% to A/B = 5%/95% at 20-20.2 min, 95% B at 20.2-23 min, A/B = 5%/95% to A/B = 90%/10% at 23-23.1 min, and A/B = 90%/10% at 23.1-25 min.

**Method 3:** mobile phase (A: water with 0.1% TFA; B: acetonitrile) in a gradient of A/B = 95%/5% at 0-1 min, A/B = 95%/5% to A/B = 60%/40% at 1-35 min, A/B = 60%/40% to A/B = 30%/70% at 35-35.1 min, 70% B at 35.1-38.5 min, A/B = 30%/70% to A/B = 95%/5% at 38.5-39 min, and A/B = 95%/5% at 39-40 min.

**Preparative HPLC:** The HPLC purification was performed on Agilent 1200 Infinity series HPLC system comprising of a G1361A prep pump, a G2260A autosampler, a G1364A fraction collector and a G7165 multiple wavelength detector. A Vydac 218TP1022 C18 column (10 µm, 2.2 cm ID x 25 cm L) was used with acetonitrile (0.1% TFA, v/v) and water (0.1% TFA, v/v) as mobile phases and a flow speed at 8 mL/min at 25 °C. The UV absorbance was measured at 214 and 280 nm.

**Method 4:** mobile phase (A: water with 0.1% TFA; B: acetonitrile) in a gradient of A/B = 95%/5% at 0-3 min, A/B = 95%/5% to A/B = 5%/95% at 3-20 min, A/B = 5%/95% at 20-22 min, A/B = 5%/95% to A/B = 95%/5% at 22-23 min, and A/B = 95%/5% at 23-28 min.

**Method 5:** mobile phase (A: water with 0.1% TFA; B: acetonitrile) in a gradient of A/B = 95%/5% at 0-3 min, A/B = 95%/5% to A/B = 60%/40% at 3-42 min, A/B = 60%/40% to A/B = 5%/95% at 42-42.5 min, A/B = 5%/95% at 42.5-46.5 min, A/B = 5%/95% to A/B = 95%/5% at 46.5-47 min, and A/B = 95%/5% at 47-50 min.

#### 4. General Synthetic Procedures

##### Procedure A. Pictet-Spengler chemoenzymatic reaction

The N-terminal tyrosine peptide (1 equiv.), aldehyde (1.5 equiv.) and sodium ascorbate (3 equiv.) were mixed in 10 mL of a 1:9 mixture of acetonitrile/potassium phosphate buffer (0.2 M, pH 6.0). *CnTYR* enzyme (10%, v/v) was added. The resulting solution was stirred at 37 °C for 18 h. Afterwards, the reaction was concentrated *in vacuo* and resuspended in 2 mL of methanol. The resuspension was filtered and purified by a preparative HPLC. Fractions were collected, concentrated, and freeze-dried to give target products.

##### Procedure B. Pictet-Spengler chemoenzymatic reactions with terephthalaldehyde

The N-terminal tyrosine peptide (3 equiv.), aldehyde (1 equiv.) and sodium ascorbate (6 equiv.) were mixed in 10 mL of a 1:9 mixture of acetonitrile/potassium phosphate buffer (0.2 M, pH 6.0). *CnTYR* enzyme (10%, v/v) was added. The resulting solution was stirred at 37 °C for 18 h. Afterwards, the reaction was concentrated *in vacuo* and resuspended in 2 mL of methanol. The resuspension was filtered and purified by a preparative HPLC. Fractions were collected, concentrated, and freeze-dried to give the target products.

##### Procedure C. General peptide coupling reaction

Acid (1 equiv.), amine (1.1 equiv.) and HBTU (1.2 equiv.) were mixed in DMF (10 mL) and cooled to 0 °C. DIPEA (5 equiv.) was added. The reaction was stirred under argon at 0 °C for 30 min, then at room temperature for 18 h. The reaction was concentrated *in vacuo* and redissolved in EtOAc (10 mL). The organic layer was then washed with 1 M HCl (3 × 10 mL), saturated NaHCO<sub>3</sub> (3 × 10 mL) and brine (10 mL), and then dried over anhydrous Na<sub>2</sub>SO<sub>4</sub>, and concentrated *in vacuo* to give the product.

##### Procedure D. DOPA-Gly formation from Tyr-Gly with TYRs

Tyr-Gly **2b** (1 equiv.) and sodium ascorbate (2-3 equiv.) were mixed in 0.2 M KPi buffer (pH 6.0), and 10% v/v *CnTYR* lysates were added. The reaction was shaken in an incubator at 37 °C for 18 h. The reaction was quenched by adding 0.1% TFA. Precipitates were removed by centrifugation. The supernatant was concentrated *in vacuo* to give **2a** as a yellow oil.

## 5. Procedures and Characterization

### (2S)-(2-Amino-3-(3',4'-dihydroxyphenyl)propanoyl)glycine (L-DOPA-Gly) **2a**<sup>2,3</sup>

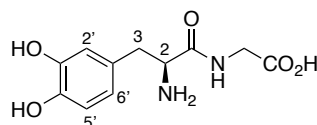

**Procedure 1:** To a solution of L-DOPA (500 mg, 2.54 mmol) in dioxane/water (1:1, 10 mL), NEt<sub>3</sub> (0.530 mL, 3.81 mmol) and di-*tert*-butyl-dicarbonate (600 mg, 2.74 mmol) were added. The mixture was stirred at 0 °C for 30 min, then at room temperature overnight. The resulting solution was concentrated and re-dissolved in H<sub>2</sub>O (5 mL), washed with EtOAc (3 x 10 mL). The aqueous layer was acidified to pH 1 by 1 M HCl and washed with EtOAc (3 x 10 mL). The combined organic layers were dried over anhydrous Na<sub>2</sub>SO<sub>4</sub> and concentrated *in vacuo* to yield Boc-DOPA (0.453 g, 60% yield) as a brown oil. To a solution of Boc-DOPA (762 mg, 2.56 mmol) in CH<sub>2</sub>Cl<sub>2</sub> (14 mL), N-Gly-O<sup>t</sup>Bu hydrochloride (320 mg, 2.56 mmol), EDC (490 mg, 2.56 mmol) and HOBT (340 mg, 2.56 mmol) were added. The mixture was cooled to 0 °C, and DIPEA (0.440 mL, 2.56 mmol) was added. The reaction solution was stirred at 0 °C for 30 min, then at room temperature overnight. The resulting solution was washed with H<sub>2</sub>O (3 x 10 mL), 2 N HCl (3 x 10 mL), saturated NaHCO<sub>3</sub> (3 x 10 mL), and dried over anhydrous Na<sub>2</sub>SO<sub>4</sub>. The organic layer was concentrated *in vacuo* to obtain Boc-DOPA-Gly-O<sup>t</sup>Bu (0.289 g, 26% yield) as a yellow oil. Protected dipeptide (1.18 g, 2.90 mmol) was then dissolved in CH<sub>2</sub>Cl<sub>2</sub> (6 mL), and the solution was cooled to 0 °C. TFA (6.0 mL, 7.8 mmol) was added. The reaction was stirred at room temperature for 5 h. The resulting solution was concentrated *in vacuo* to remove excess TFA and solvent to give N-DOPA-Gly-OH **2a** (0.61 g, 83% yield) as a yellow oil. [ $\alpha$ ]<sub>D</sub><sup>26</sup> +20.0 (c 1.0, CH<sub>3</sub>OH);  $\nu_{\max}$  (solution in CH<sub>3</sub>OH)/cm<sup>-1</sup> 3335, 3296, 1633; <sup>1</sup>H NMR (700 MHz; D<sub>2</sub>O)  $\delta$  6.82 (1H, d, *J* = 8.1 Hz, 5'-H), 6.74 (1H, d, *J* = 2.2 Hz, 2'-H), 6.66 (1H, dd, *J* = 8.1, 2.2 Hz, 6'-H), 4.17 (1H, t, *J* = 7.2 Hz, 2-H), 3.97 (1H, d, *J* = 18.0 Hz, NHCHH), 3.89 (1H, d, *J* = 18.0 Hz, NHCHH), 3.06 (1H, dd, *J* = 14.2, 7.2 Hz, 3-HH), 3.00 (1H, dd, *J* = 14.2, 7.2 Hz, 3-HH); <sup>13</sup>C NMR (176 MHz; D<sub>2</sub>O)  $\delta$  173.3, 170.2, 144.8, 144.1, 126.7, 122.4, 117.6, 117.0, 55.0, 41.5, 36.6. *m/z* [ES<sup>+</sup>] 255 ([M+H]<sup>+</sup>, 100%); *m/z* [HRMS ES<sup>-</sup>] found [M-H]<sup>-</sup> 253.0824. [C<sub>11</sub>H<sub>14</sub>N<sub>2</sub>O<sub>5</sub>-H]<sup>-</sup> requires 253.0829.

**Procedure 2: 2b** (100 mg, 0.420 mmol) and sodium ascorbate (168 mg, 0.840 mmol) were mixed in 0.2 M KPi buffer (pH 6.0, 10 mL), 10% v/v CnTYR lysates were added. The reaction was shaken in the incubator at 37 °C, 18 h. After reaction, 0.1% TFA was added and centrifuged. The supernatant was concentrated *in vacuo* to give **2a** (105 mg, 99%) as a yellow oil. The characterisation data was identical to that above.



## L-Tyrosyl glycine (L-Tyr-Gly) **2b**<sup>2,4</sup>

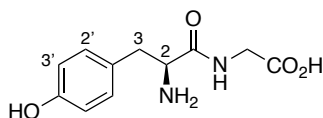

The protected dipeptide was prepared according to **Procedure C** using Boc-Tyr(<sup>t</sup>Bu)-OH (0.17 g, 0.50 mmol) and *tert*-butyl glycine hydrochloride (92 mg, 0.55 mmol). The product was purified using silica gel column chromatography (petroleum ether 40-60/ethyl acetate, 4:1 to 1:1) to give Boc-Tyr(<sup>t</sup>Bu)-Gly-O<sup>t</sup>Bu (0.19 g, 86%) as a yellow oil. *R*<sub>f</sub> = 0.5 (petroleum ether 40-60/ethyl acetate, 2:1). Boc-L-Tyr(<sup>t</sup>Bu)-Gly-O<sup>t</sup>Bu (195 mg, 0.430 mmol) was then dissolved in CH<sub>2</sub>Cl<sub>2</sub> (10 mL), cooled to 0 °C, and TFA (10 mL) was added. The reaction was stirred under argon at 0 °C for 30 min, then at room temperature for 4 h. The reaction was then concentrated *in vacuo* to give the crude product. The product was further purified by preparative HPLC (**Method 4**, *R*<sub>t</sub> = 13.2 min) to give **2b** (150 mg, 90% yield) as a colourless oil.  $[\alpha]_{\text{D}}^{26} +31.7$  (c 0.6, CH<sub>3</sub>OH);  $\nu_{\text{max}}$  (solution in CH<sub>3</sub>OH)/cm<sup>-1</sup> 3326, 3288, 1643, 1014; <sup>1</sup>H NMR (700 MHz; CD<sub>3</sub>OD)  $\delta$  7.12 (2H, d, *J* = 8.5 Hz, 3'-H), 6.77 (2H, d, *J* = 8.5 Hz, 2'-H), 4.04 (1H, dd, *J* = 8.2, 6.0 Hz, 2-H), 3.98 (1H, d, *J* = 17.8 Hz, NHCHH), 3.90 (1H, d, *J* = 17.8 Hz, NHCHH), 3.16 (1H, dd, *J* = 14.3, 6.0 Hz, 3-HH), 3.07 (1H, dd, *J* = 14.3, 8.2 Hz, 3-HH); <sup>13</sup>C NMR (151 MHz; CD<sub>3</sub>OD)  $\delta$  172.7, 170.2, 158.4, 125.9, 121.6, 116.8, 56.0, 41.6, 37.6; *m/z* [ES<sup>+</sup>] 239 ([M+H]<sup>+</sup>, 100%); *m/z* [HRMS ES<sup>+</sup>] found [M+H]<sup>+</sup> 239.1026. [C<sub>11</sub>H<sub>14</sub>N<sub>2</sub>O<sub>4</sub>+H]<sup>+</sup> requires 239.1026.

## ((3*S*)-1-Benzyl-6,7-dihydroxy-1,2,3,4-tetrahydroisoquinoline-3-carbonyl)glycine **3a**

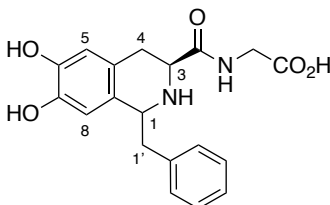

Compound **3a** (both isomers) were prepared according to **procedure A** using **2b** (23.8 mg, 0.100 mmol) and phenylacetaldehyde **1a** (17.5  $\mu$ L, 0.150 mmol). The product was purified by preparative HPLC (**Method 5**, *R*<sub>t</sub> = 27.4 min) to give **3a** (the two diastereomers were assigned from the <sup>1</sup>H NMR NOE data) as a white solid (9.7 mg, 27% yield) (75% HPLC yield against product standards). M.p. 250-260 °C;  $\nu_{\text{max}}$  (neat)/cm<sup>-1</sup> 3033, 1664, 1186, 1130; (1*R*,3*S*) (53% ratio): <sup>1</sup>H NMR (600 MHz; CD<sub>3</sub>OD)  $\delta$  7.42-7.17 (5H, m, Ph-H), 6.63 (1H, s, 5-H), 6.04 (1H, s, 8-H), 4.66 (1H, dd, *J* = 8.8, 4.9 Hz, 1-H), 4.32 (1H, dd, *J* = 11.6, 5.7 Hz, 3-H), 4.04 (1H, d, *J* = 17.8 Hz, NHCHH), 4.00 (1H, d, *J* = 17.8 Hz, NHCHH), 3.34 (1H, dd, *J* = 13.3, 4.9 Hz, 1'-HH), 3.26 (1H, dd, *J* = 16.9, 5.7 Hz, 4-HH), 3.15 (1H, dd, *J* = 13.3, 8.8 Hz, 1'-HH), 3.04 (1H, dd, *J* = 16.9, 11.6 Hz, 4-HH); <sup>13</sup>C NMR (151 MHz; CD<sub>3</sub>OD)  $\delta$  172.6, 170.2, 147.2, 145.5, 130.6, 130.3, 130.0, 128.7, 122.7, 121.8, 115.9, 114.9, 57.2, 52.3, 41.7, 41.5, 30.1. (1*S*,3*S*) (47%

ratio):  $^1\text{H}$  NMR (600 MHz;  $\text{CD}_3\text{OD}$ )  $\delta$  7.42-7.17 (5H, m, Ph-H), 6.85 (1H, s, 5-H), 6.66 (1H, s, 8-H), 4.70 (1H, dd,  $J = 9.7, 4.9$  Hz, 1-H), 4.03-4.00 (1H, m, 3-H), 4.00 (1H, d,  $J = 18.0$  Hz, NHCHH), 3.94 (1H, d,  $J = 18.0$  Hz, NHCHH), 3.63 (1H, dd,  $J = 14.5, 4.9$  Hz, 1'-HH), 3.20-3.10 (2H, m, 4-H<sub>2</sub>), 3.04 (1H, dd,  $J = 14.5, 9.7$  Hz, 1'-HH);  $^{13}\text{C}$  NMR (151 MHz;  $\text{CD}_3\text{OD}$ )  $\delta$  172.6, 170.2, 147.2, 146.4, 130.6, 130.3, 130.0, 128.7, 123.5, 123.0, 116.0, 113.5, 57.5, 57.2, 41.6, 40.9, 30.8.  $m/z$  [ES+] 357 ( $[\text{M}+\text{H}]^+$ , 100%);  $m/z$  [HRMS ES+] found  $[\text{M}+\text{H}]^+$  357.1445.  $[\text{C}_{19}\text{H}_{20}\text{N}_2\text{O}_5+\text{H}]^+$  requires 357.1445.

**((3S)-6,7-Dihydroxy-1-phenyl-1,2,3,4-tetrahydroisoquinoline-3-carbonyl)glycine 3b**

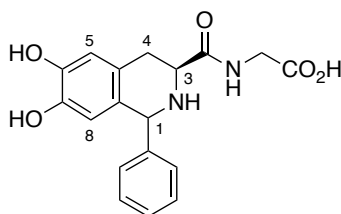

**Compound 3b** (both isomers) were prepared according to **procedure A** using L-Tyr-Gly (23.8 mg, 0.100 mmol) and benzaldehyde (15.3  $\mu\text{L}$ , 0.150 mmol). The product was purified by preparative HPLC (**Method 5**,  $R_t = 23.2$  min) to give **3b** (the two diastereomers were assigned from the  $^1\text{H}$  NMR NOE data) as a white solid (10 mg, 29% yield) (43% HPLC yield against product standards). M.p. 160-164  $^\circ\text{C}$ ;  $\nu_{\text{max}}$  (neat)/ $\text{cm}^{-1}$  3079, 1666, 1191; (1*R*,3*S*) (74% ratio):  $^1\text{H}$  NMR (600 MHz;  $\text{CD}_3\text{OD}$ )  $\delta$  7.48-7.30 (5H, m, Ph-H), 6.72 (1H, s, 5-H), 6.35 (1H, s, 8-H), 5.72 (1H, s, 1-H), 4.19 (1H, dd,  $J = 11.7, 5.2$  Hz, 3-H), 3.96 (d,  $J = 17.8$  Hz, 1H, NHCHH), 3.92 (1H, d,  $J = 17.8$  Hz, NHCHH), 3.28 (1H, dd,  $J = 16.9, 5.2$  Hz, 4-HH), 3.15 (1H, dd,  $J = 16.9, 11.7$  Hz, 4-HH);  $^{13}\text{C}$  NMR (151 MHz;  $\text{CD}_3\text{OD}$ )  $\delta$  172.9, 169.3, 147.5, 146.4, 137.8, 131.0, 130.6, 130.2, 123.1, 121.8, 115.5, 115.1, 59.1, 51.2, 41.6, 29.8. (1*S*,3*S*) (26% ratio):  $^1\text{H}$  NMR (600 MHz;  $\text{CD}_3\text{OD}$ )  $\delta$  7.48-7.30 (5H, m, Ph-H), 6.70 (1H, s, 5-H), 6.10 (1H, s, 8-H), 5.59 (1H, s, 1-H), 4.42 (1H, dd,  $J = 9.4, 8.1$  Hz, 3-H), 4.03 (1H, d,  $J = 17.8$  Hz, 1H, NHCHH), 4.01 (1H, d,  $J = 17.8$  Hz, NHCHH), 3.35-3.25 (2H, m, 4-H<sub>2</sub>);  $^{13}\text{C}$  NMR (176 MHz;  $\text{CD}_3\text{OD}$ )  $\delta$  172.7, 169.5, 146.7, 146.4, 137.8, 131.4, 130.5, 130.4, 123.7, 123.5, 116.0, 115.0, 62.9, 58.0, 41.6, 30.5.  $m/z$  [ES+] 343 ( $[\text{M}+\text{H}]^+$ , 100%);  $m/z$  [HRMS ES+] found  $[\text{M}+\text{H}]^+$  343.1289.  $[\text{C}_{18}\text{H}_{18}\text{N}_2\text{O}_5+\text{H}]^+$  requires 343.1288.

**((3S)-1-(4-Chlorophenyl)-6,7-dihydroxy-1,2,3,4-tetrahydroisoquinoline-3-carbonyl)glycine 3c**

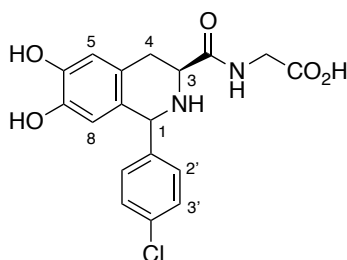

**Compound 3c** (both isomers) were prepared according to **procedure A** using L-Tyr-Gly (23.8 mg, 0.100 mmol) and 4-chlorobenzaldehyde (21.1 mg, 0.150 mmol). The product was purified by preparative HPLC (**Method 5**,  $R_t = 31.2$  min) to give **3c** (the two diastereomers were assigned from the  $^1\text{H}$  NMR NOE data) as white solid (6.6 mg, 17% yield) (47% HPLC yield against product standards). M.p.  $166\text{ }^\circ\text{C}$ ;  $\nu_{\text{max}}$  (neat)/ $\text{cm}^{-1}$  3064, 1664, 1189, 797; (1*R*,3*S*) (72% ratio):  $^1\text{H}$  NMR (600 MHz;  $\text{CD}_3\text{OD}$ )  $\delta$  7.46 (2H, d,  $J = 8.5$  Hz, 3'-H), 7.28 (2H, d,  $J = 8.5$  Hz, 2'-H), 6.72 (1H, s, 5-H), 6.35 (1H, s, 8-H), 5.72 (1H, s, 1-H), 4.14 (1H, dd,  $J = 11.7, 5.2$  Hz, 3-H), 3.97 (1H, d,  $J = 17.8$  Hz, NHCHH), 3.90 (1H, d,  $J = 17.8$  Hz, NHCHH), 3.27 (1H, dd,  $J = 16.9, 5.2$  Hz, 4-HH), 3.14 (1H, dd,  $J = 16.9, 11.7$  Hz, 4-HH);  $^{13}\text{C}$  NMR (151 MHz;  $\text{CD}_3\text{OD}$ )  $\delta$  173.0, 170.1, 147.5, 146.1, 137.1, 136.7, 133.4, 130.2, , 123.1, 121.6, 115.6, 114.9, 58.7, 51.6, 41.9, 30.2. (1*S*,3*S*) (28% ratio):  $^1\text{H}$  NMR (600 MHz;  $\text{CD}_3\text{OD}$ )  $\delta$  7.51 (2H, d,  $J = 8.5$  Hz, 3'-H), 7.46 (2H, d,  $J = 8.5$  Hz, 2'-H), 6.70 (1H, s, 5-H), 6.08 (1H, s, 8-H), 5.60 (1H, s, 1-H), 4.41 (1H, dd,  $J = 11.1, 6.3$  Hz, 3-H), 4.02 (1H, d,  $J = 17.7$  Hz, NHCHH), 4.01 (1H, d,  $J = 17.7$  Hz, NHCHH), 3.45-3.35 (2H, m, 4-H<sub>2</sub>);  $^{13}\text{C}$  NMR (151 MHz;  $\text{CD}_3\text{OD}$ )  $\delta$  173.0, 170.1, 146.9, 146.1, 137.1, 136.7, 133.3, 130.2, 123.8, 123.2, 115.5, 114.9, 62.3, 57.8, 42.0, 30.7;  $m/z$  [ES<sup>+</sup>] 377 ([M+H]<sup>+</sup>, 100%);  $m/z$  [HRMS ES<sup>+</sup>] found [M+H]<sup>+</sup> 377.0900. [ $\text{C}_{18}\text{H}_{17}\text{N}_2\text{O}_5^{35}\text{Cl}+\text{H}$ ]<sup>+</sup> requires 377.0899.

**((3*S*)-1-(4-Bromophenyl)-6,7-dihydroxy-1,2,3,4-tetrahydroisoquinoline-3-carbonyl)glycine 3d**

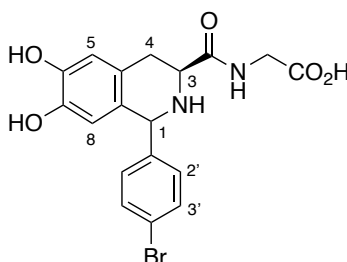

**Compound 3d** (both isomers) were prepared according to **procedure A** using L-Tyr-Gly (23.8 mg, 0.100 mmol) and 4-bromobenzaldehyde (27.7 mg, 0.150 mmol). The product was purified by preparative HPLC (**Method 5**,  $R_t = 31.8$  min) to give **3d** (the two diastereomers were assigned from the  $^1\text{H}$  NMR NOE data) as a white solid (7.4 mg, 17% yield) (62% HPLC yield against product standards). M.p.  $162\text{ }^\circ\text{C}$ ;  $\nu_{\text{max}}$  (neat)/ $\text{cm}^{-1}$  3066, 1666, 1189, 721; (1*R*,3*S*) (77% ratio):  $^1\text{H}$  NMR (600 MHz;  $\text{CD}_3\text{OD}$ )  $\delta$  7.62 (2H, d,  $J = 8.5$  Hz, 3'-H), 7.22 (2H, d,  $J = 8.5$  Hz, 2'-

H), 6.72 (1H, s, 5-H), 6.35 (1H, s, 8-H), 5.72 (1H, s, 1-H), 4.14 (1H, dd,  $J = 11.7, 5.2$  Hz, 3-H), 3.97 (1H, d,  $J = 17.8$  Hz, NHCHH), 3.90 (1H, d,  $J = 17.8$  Hz, NHCHH), 3.27 (1H, dd,  $J = 16.9, 5.2$  Hz, 4-HH), 3.14 (1H, dd,  $J = 16.9, 11.7$  Hz, 4-HH);  $^{13}\text{C}$  NMR (151 MHz;  $\text{CD}_3\text{OD}$ )  $\delta$  173.0, 170.1, 147.5, 146.1, 137.1, 133.4, 133.3, 125.1, 123.1, 121.6, 115.6, 114.9, 58.7, 51.6, 41.9, 30.2. (1*S*,3*S*) (23% ratio):  $^1\text{H}$  NMR (600 MHz;  $\text{CD}_3\text{OD}$ )  $\delta$  7.67 (2H, d,  $J = 8.5$  Hz, 3'-H), 7.39 (2H, d,  $J = 8.5$  Hz, 2'-H), 6.70 (1H, s, 5-H), 6.08 (1H, s, 8-H), 5.60 (1H, s, 1-H), 4.41 (1H, dd,  $J = 11.1, 6.3$  Hz, 3-H), 4.03 (1H, d,  $J = 17.7$  Hz, NHCHH), 3.99 (1H, d,  $J = 17.7$  Hz, NHCHH), 3.45-3.35 (2H, m, 4-H<sub>2</sub>);  $^{13}\text{C}$  NMR (151 MHz;  $\text{CD}_3\text{OD}$ )  $\delta$  173.0, 170.1, 147.5, 146.1, 137.1, 133.4, 133.3, 125.1, 123.2, 123.1, 115.9, 114.9, 62.3, 58.1, 41.9, 30.7.  $m/z$  [ES<sup>+</sup>] 421 ([M+H]<sup>+</sup>, 100%);  $m/z$  [HRMS ES<sup>-</sup>] found [M-H]<sup>-</sup> 419.0248. [ $\text{C}_{18}\text{H}_{17}\text{N}_2\text{O}_5^{79}\text{Br-H}$ ]<sup>-</sup> requires 419.0233.

**((3*S*)-1-(2-Bromophenyl)-6,7-dihydroxy-1,2,3,4-tetrahydroisoquinoline-3-carbonyl)glycine 3e**

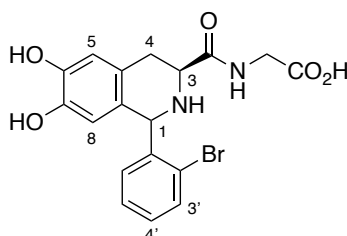

**Compound 3e** (both isomers) were prepared according to **procedure A** using L-Tyr-Gly (23.8 mg, 0.100 mmol) and 4-chlorobenzaldehyde (27.7 mg, 0.150 mmol). The product was purified by preparative HPLC (**Method 5**,  $R_t = 25.3$  min) to give **3e** (the two diastereomers were assigned from the  $^1\text{H}$  NMR NOE data) as a white solid (10 mg, 24% yield) (52% HPLC yield against product standards). M.p. 148 °C;  $\nu_{\text{max}}$  (neat)/ $\text{cm}^{-1}$  3066, 1666, 1189, 721; (1*S*,3*S*) (59% ratio):  $^1\text{H}$  NMR (600 MHz;  $\text{CD}_3\text{OD}$ )  $\delta$  7.81-7.04 (4H, m, Ph-H), 6.73 (1H, s, 5-H), 6.23 (1H, s, 8-H), 6.15 (1H, s, 1-H), 4.20 (1H, dd,  $J = 11.7, 4.7$  Hz, 3-H), 3.99 (1H, d,  $J = 17.8$  Hz, NHCHH), 3.95 (1H, d,  $J = 17.8$  Hz, NHCHH), 3.29 (1H, dd,  $J = 16.9, 4.7$  Hz, 4-HH), 3.12 (1H, dd,  $J = 16.9, 11.7$  Hz, 4-HH);  $^{13}\text{C}$  NMR (151 MHz;  $\text{CD}_3\text{OD}$ )  $\delta$  172.9, 169.3, 147.5, 146.9, 137.5, 134.8, 130.0, 129.5, 126.8, 123.4, 121.2, 114.8, 114.7, 58.1, 51.8, 41.9, 30.6. (1*R*,3*S*) (41% ratio):  $^1\text{H}$  NMR (600 MHz;  $\text{CD}_3\text{OD}$ )  $\delta$  7.81-7.04 (4H, m, Ph-H), 6.71 (1H, s, 5-H), 5.98 (1H, s, 8-H), 6.11 (1H, s, 1-H), 4.56 (1H, dd,  $J = 11.7, 4.7$  Hz, 3-H), 4.05 (1H, d,  $J = 17.8$  Hz, NHCHH), 4.00 (1H, d,  $J = 17.8$  Hz, NHCHH), 3.40-3.29 (2H, m, 4-H<sub>2</sub>);  $^{13}\text{C}$  NMR (151 MHz;  $\text{CD}_3\text{OD}$ )  $\delta$  172.9, 169.3, 146.9, 146.2, 137.5, 134.8, 130.0, 129.5, 126.8, 123.5, 123.3, 115.5, 114.7, 61.6, 58.3, 41.9, 30.6.  $m/z$  [ES<sup>+</sup>] 421 ([M+H]<sup>+</sup>, 100%);  $m/z$  [HRMS ES<sup>+</sup>] found [M+H]<sup>+</sup> 421.0393. [ $\text{C}_{18}\text{H}_{17}\text{N}_2\text{O}_5^{79}\text{Br+H}$ ]<sup>+</sup> requires 421.0394.

**((3S)-6,7-Dihydroxy-1-(4-methoxyphenyl)-1,2,3,4-tetrahydroisoquinoline-3-carbonyl)glycine 3g**

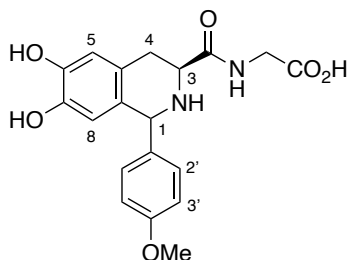

**Compound 3g** (both isomers) were prepared according to **procedure A** using L-Tyr-Gly (23.8 mg, 0.100 mmol) and 4-chlorobenzaldehyde (27.7 mg, 0.150 mmol). The product was purified by preparative HPLC (**Method 5**,  $R_t = 25.3$  min) to give **3g** (the two diastereomers were assigned from the  $^1\text{H}$  NMR NOE data) as a white solid (0.6 mg, 15% yield) (20% HPLC yield against product standards). M.p.  $195\text{ }^\circ\text{C}$ ;  $\nu_{\text{max}}$  (solution in  $\text{CH}_3\text{OH}$ )/ $\text{cm}^{-1}$  3333, 2944, 1635, 1414; (1*R*,3*S*) (80% ratio):  $^1\text{H}$  NMR (500 MHz;  $\text{CD}_3\text{OD}$ )  $\delta$  7.21 (2H, d,  $J = 8.8$  Hz, 3'-H), 6.98 (2H, d,  $J = 8.8$  Hz, 2'-H), 6.72 (1H, s, 5-H), 6.63 (1H, s, 8-H), 5.68 (1H, s, 1-H), 4.18 (1H, dd,  $J = 11.8, 5.3$  Hz, 3-H), 4.02-3.90 (2H, m,  $\text{NHCH}_2$ ), 3.81 (3H, s,  $\text{OCH}_3$ ), 3.26 (1H, dd,  $J = 16.9, 5.3$  Hz, 4-HH), 3.13 (1H, dd,  $J = 16.9, 11.8$  Hz, 4-HH);  $^{13}\text{C}$  NMR (126 MHz;  $\text{CD}_3\text{OD}$ )  $\delta$  170.6, 168.7, 160.8, 145.8, 145.7, 131.2, 128.3, 122.0, 121.2, 114.0, 113.9, 113.7, 57.6, 54.5, 50.3, 40.2, 28.8. (1*S*,3*S*) (20% ratio):  $^1\text{H}$  NMR (500 MHz;  $\text{CD}_3\text{OD}$ )  $\delta$  7.39 (2H, d,  $J = 8.7$  Hz, 3'-H), 7.03 (2H, d,  $J = 8.7$  Hz, 2'-H), 6.69 (1H, s, 5-H), 6.14 (1H, s, 8-H), 5.54 (1H, s, 1-H), 4.41-4.39 (1H, m, 3-H), 4.00-3.97 (2H, m,  $\text{NHCH}_2$ ), 3.85 (2H, s,  $\text{OCH}_3$ ), 3.36-3.30 (2H, m, 4-H<sub>2</sub>).  $^{13}\text{C}$  NMR (176 MHz;  $\text{CD}_3\text{OD}$ )  $\delta$  173.3, 170.0, 163.4, 155.9, 144.7, 132.2, 131.5, 131.2, 123.0, 122.8, 114.5, 114.0, 61.0, 56.4, 47.7, 44.4, 28.9.  $m/z$  [ES+] 373 ( $[\text{M}+\text{H}]^+$ , 100%);  $m/z$  [HRMS ES+] found  $[\text{M}+\text{H}]^+$  373.1392.  $[\text{C}_{19}\text{H}_{20}\text{N}_2\text{O}_6+\text{H}]^+$  requires 373.1394.

**((3S)-1-(4-Formylphenyl)-6,7-dihydroxy-1,2,3,4-tetrahydroisoquinoline-3-carbonyl)glycine 3h**

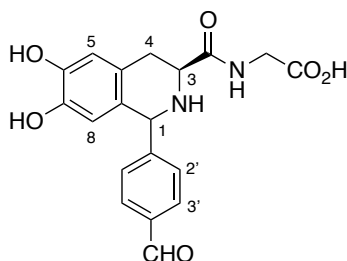

**Compound 3h** was prepared according to **procedure B** using L-Tyr-Gly (71.4 mg, 0.300 mmol) and terephthaldehyde (13.4 mg, 0.100 mmol). The product was purified by preparative HPLC (**Method 4**,  $R_t = 20.0$  min) to give **3h** as a white solid (0.5 mg, 4% yield) (30% yield by HPLC against product standards). M.p.  $150\text{ }^\circ\text{C}$ ;  $\nu_{\text{max}}$  (neat)/ $\text{cm}^{-1}$  3066, 1666, 1189; (1*R*,3*S*)

(major isomer):  $^1\text{H}$  NMR (500 MHz;  $\text{CD}_3\text{OD}$ )  $\delta$  10.04 (1H, s, CHO), 7.99 (2H, d,  $J = 8.1$  Hz, 3'-H), 7.52 (2H, d,  $J = 8.1$  Hz, 2'-H), 6.76 (1H, s, 5-H), 6.36 (1H, s, 8-H), 5.85 (1H, s, 1-H), 4.19 (1H, dd,  $J = 11.6, 5.2$  Hz, 3-H), 3.97-3.96 (2H, m,  $\text{NHCH}_2$ ), 3.32-3.19 (2H, m, 4-H<sub>2</sub>);  $^{13}\text{C}$  (176 MHz;  $\text{CD}_3\text{OD}$ )  $\delta$  179.7, 178.5, 168.8, 148.3, 147.8, 137.6, 131.8, 129.7, 127.0, 123.0, 120.5, 114.0, 113.7, 57.6, 50.1, 40.3, 39.0. (1*S*,3*S*) (minor isomer):  $^1\text{H}$  NMR (500 MHz;  $\text{CD}_3\text{OD}$ )  $\delta$  10.08 (1H, s, CHO), 8.05 (2H, d,  $J = 8.0$  Hz, 3'-H), 7.70 (2H, d,  $J = 8.0$  Hz, 2'-H), 6.73 (1H, s, 5-H), 6.35 (1H, s, 8-H), 5.74 (1H, s, 1-H), 4.47 (1H, dd,  $J = 11.1, 6.3$  Hz, 3-H), 4.05-4.02 (2H, m,  $\text{NHCH}_2$ ), 3.38-3.34 (2H, m, 4-H<sub>2</sub>);  $^{13}\text{C}$  (176 MHz;  $\text{CD}_3\text{OD}$ )  $\delta$  179.7, 178.5, 169.8, 150.8, 145.1, 135.2, 131.2, 130.9, 129.3, 123.0, 120.5, 114.5, 113.7, 52.8, 50.1, 40.9, 39.8.  $m/z$  [ES+] 371 ([ $\text{M}+\text{H}$ ]<sup>+</sup>, 100%);  $m/z$  [HRMS ES+] found [ $\text{M}+\text{H}$ ]<sup>+</sup> 371.1237. [ $\text{C}_{19}\text{H}_{18}\text{N}_2\text{O}_6+\text{H}$ ]<sup>+</sup> requires 371.1237.

**3h-dimer**  $m/z$  [ES+] 607 ([ $\text{M}+\text{H}$ ]<sup>+</sup>, 100%);  $m/z$  [HRMS ES+] found [ $\text{M}+\text{H}$ ]<sup>+</sup> 607.2022. [ $\text{C}_{30}\text{H}_{31}\text{N}_4\text{O}_{10}+\text{H}$ ]<sup>+</sup> requires 607.2035.

**(3*S*,3'*S*)-1,1'-(1,4-Phenylene)bis(6,7-dihydroxy-1,2,3,4-tetrahydroisoquinoline-3-carboxylic acid) 3h-dimer**

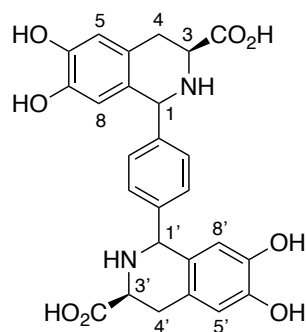

The dimer was prepared according to **Procedure B** using L-DOPA (80 mg, 0.40 mmol) and terephthalaldehyde (26 mg, 0.20 mmol). The product was purified by preparative HPLC (**Method 4**,  $R_t = 13.7$  min) to give **dimer products** (major product) as a white solid (3.1 mg, 4% yield) (40%, HPLC yield against product standards). M.p. 150 °C;  $\nu_{\text{max}}$  (neat)/ $\text{cm}^{-1}$  3066, 1666, 1189; (1*S*,1'*R*,3*S*,3'*S*) (50% ratio):  $^1\text{H}$  NMR (700 MHz;  $\text{CD}_3\text{OD}$ )  $\delta$  7.55 (2H, d,  $J = 8.4$  Hz, Ph-H), 7.47 (2H, d,  $J = 8.4$  Hz, Ph-H), 6.75 (1H, s, 5'-H), 6.70 (1H, s, 5-H), 6.33 (1H, s, 8'-H), 6.04 (1H, s, 8-H), 5.84 (1H, s, 1'-H), 5.63 (1H, s, 1-H), 4.46 (1H, dd,  $J = 12.6, 5.1$  Hz, 3-H), 4.20 (1H, dd,  $J = 10.1, 5.6$  Hz, 3'-H), 3.40-3.22 (2H, m, 4'-H<sub>2</sub>), 3.36-3.27 (2H, m, 4-H<sub>2</sub>);  $^{13}\text{C}$  NMR (176 MHz;  $\text{CD}_3\text{OD}$ )  $\delta$  171.1, 170.9, 147.1, 147.0, 146.9, 146.8, 139.6, 139.2, 132.1, 131.7, 123.6, 123.2, 123.0, 121.0, 115.7, 115.0, 114.8, 62.2, 58.7, 57.0, 52.1, 29.5, 29.1. (1*R*,1'*R*,3*S*,3'*S*) (50% ratio):  $^1\text{H}$  NMR (700 MHz;  $\text{CD}_3\text{OD}$ )  $\delta$  7.40 (4H, s, Ph-H), 6.72 (2H, s, 5,5'-H), 6.29 (2H, s, 8,8'-H), 5.79 (2H, s, 1,1'-H), 4.16 (2H, dd,  $J = 10.1, 5.6$  Hz, 3-H), 3.37-3.17 (4H, m, 4,4'-H<sub>2</sub>);  $^{13}\text{C}$  NMR (176 MHz;  $\text{CD}_3\text{OD}$ )  $\delta$  170.9, 147.2, 146.8, 139.4, 132.0, 123.1,

122.9, 115.7, 114.8, 58.7, 51.9, 29.2.  $m/z$  [ES+] 493 ( $[M+H]^+$ , 100%);  $m/z$  [HRMS ES+] found  $[M+H]^+$  493.1602.  $[C_{26}H_{24}N_2O_8+H]^+$  requires 493.1605.

### ((3S)-6,7-Dihydroxy-1-(pyren-1-yl)-1,2,3,4-tetrahydroisoquinoline-3-carbonyl)glycine **3i**

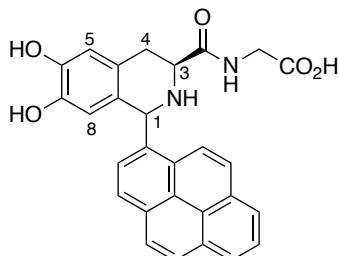

**Compound 3i** was prepared using L-DOPA-Gly (25.4 mg, 0.100 mmol, afforded from **2b** according to **Procedure D**), 1-pyrenecarbaldehyde (34.5 mg, 0.150 mmol) and sodium ascorbate (40 mg, 0.20 mmol) in 0.2 M KPi/MeOH/MeCN (1:1:1, 10 mL), at 50 °C, 18 h. The product was purified by preparative HPLC (**Method 4**,  $R_t = 12.6$  min) to give **3i** as a white oil (5.0 mg, 10% yield) (50% HPLC yield against product standards).  $\nu_{max}$  (solution in  $CH_3OH$ )/ $cm^{-1}$  3332, 1630, 1418;  $^1H$  NMR (500 MHz;  $CD_3OD$ )  $\delta$  8.62-7.68 (9H, m, Ph-H), 6.89 (1H, s, 5-H), 6.83 (1H, s, 8-H), 6.31-6.29 (1H, m, 1-H), 4.35-3.34 (1H, m, 3-H), 3.99 (1H, d,  $J = 18.0$  Hz, NHCHH), 3.80 (1H, d,  $J = 18.0$  Hz, NHCHH), 3.40-3.27 (2H, m, 4-H<sub>2</sub>).  $^{13}C$  NMR (176 MHz,  $CD_3OD$ )  $\delta$  176.0, 170.1, 146.7, 146.1, 138.5, 129.4, 129.1, 127.4, 126.5, 124.7, 121.8, 121.7, 121.6, 119.0, 118.0, 117.3, 117.2, 116.7, 116.6, 115.8, 113.7, 112.9, 67.7, 55.8, 42.6, 38.0.  $m/z$  [ES+] 467 ( $[M+H]^+$ , 100%);  $m/z$  [HRMS ES+] found  $[M+H]^+$  467.1598.  $[C_{28}H_{22}N_2O_5+H]^+$  requires 467.1562.

### 4-(Pyren-1-yl)butanal **1j**<sup>5</sup>

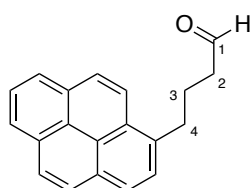

1-Pyrenebutyric acid (0.14 g, 0.50 mmol) and *N,O*-dimethylhydroxylamine hydrochloride (53.6 mg, 0.550 mmol) were used to synthesise a Weinreb amide precursor<sup>6</sup> according to **Procedure C**.<sup>5</sup> The Weinreb amide (83 mg, 0.25 mmol) was then dissolved in anhydrous THF (10 mL), cooled to 0 °C.  $LiAlH_4$  (0.31 mL, 0.75 mmol) was added dropwise. The reaction was stirred at 0 °C for 30 min, then quenched with brine (10 mL), filtered, and concentrated *in vacuo*. The product was then extracted with EtOAc (3 x 10 mL), filtered, and concentrated *in vacuo* to give **1j** as a white solid (30 mg, 44%). M.p. 71-73 °C;  $R_f = 0.6$  (hexane/ethyl acetate, 2:1).  $^1H$  NMR (700 MHz;  $CDCl_3$ )  $\delta$  9.81 (1H, d,  $J = 1.5$  Hz, CHO), 8.29-7.85 (9H, m, Ph-H), 3.42-3.38 (2H, m, 2-H<sub>2</sub>), 2.59-2.75 (2H, m, 4-H<sub>2</sub>), 2.23-2.19 (2H, m, 3-H<sub>2</sub>);  $^{13}C$  NMR (176 MHz,

$\text{CDCl}_3$ )  $\delta$  202.3, 135.6, 131.5, 131.0, 130.1, 128.8, 127.6, 127.6, 127.4, 126.9, 126.0, 125.2, 125.1, 124.9, 123.3, 21.1, 14.3, 14.2.  $m/z$  [ES<sup>+</sup>] 273 ([M+H]<sup>+</sup>, 100%).  $m/z$  [HRMS ES<sup>+</sup>] found [M+H]<sup>+</sup> 273.1265. [C<sub>20</sub>H<sub>16</sub>O+H]<sup>+</sup> requires 273.1273.

**((3S)-6,7-Dihydroxy-1-(3-(pyren-2-yl)propyl)-1,2,3,4-tetrahydroisoquinoline-3-carbonyl)glycine 3j**

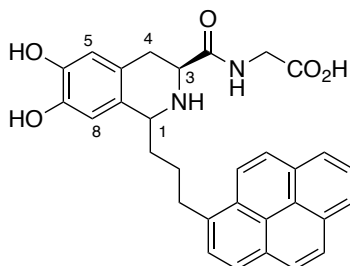

**Compound 3j** (both isomers) were prepared using L-DOPA-Gly (25.4 mg, 0.100 mmol, afforded from **2b** according to **Procedure D**), aldehyde (40.5 mg, 0.150 mmol) and sodium ascorbate (40 mg, 0.20 mmol) in 0.2 M KPi/MeOH/EtOAc (5:3:2, 10 mL), at 50 °C, 18 h. The product was purified by preparative HPLC (**Method 4**,  $R_t$  = 20.7 min) to give **3j** as a white solid (7.6 mg, 15% yield) (60% HPLC yield against product standards). M.p. 135-140 °C;  $\nu_{\text{max}}$  (neat)/ $\text{cm}^{-1}$  3066, 1666, 1189; (1S,3S) (50% ratio): <sup>1</sup>H NMR (500 MHz; CD<sub>3</sub>OD)  $\delta$  8.38-7.93 (9H, m, Ph-H), 6.73 (1H, s, 5-H), 6.62 (1H, s, 8-H), 4.49-4.48 (1H, m, 1-H), 4.09 (1H, dd,  $J$  = 11.9, 5.1 Hz, 3-H), 4.01-3.98 (2H, m, NHCH<sub>2</sub>), 3.55-3.53 (2H, m, CH<sub>2</sub>Ph), 3.47-3.45 (2H, m, CHCH<sub>2</sub>), 3.17-3.13 (2H, m, 4-H<sub>2</sub>), 2.15-2.10 (2H, m, CH<sub>2</sub>H<sub>2</sub>CH<sub>2</sub>); <sup>13</sup>C NMR (126 MHz; CD<sub>3</sub>OD)  $\delta$  168.5, 168.0, 145.3, 144.6, 131.4, 130.6, 130.3, 128.8, 127.2, 127.1, 126.7, 125.6, 124.5, 124.4, 121.6, 120.2, 114.7, 113.0, 56.1, 55.1, 54.9, 34.0, 32.7, 27.8, 27.7. (1R,3S) (50% ratio): <sup>1</sup>H NMR (500 MHz; CD<sub>3</sub>OD)  $\delta$  8.38-7.93 (9H, m, Ph-H), 6.62 (1H, s, 5-H), 6.61 (1H, s, 8-H), 4.44-4.42 (1H, m, 1-H), 4.32 (1H, dd,  $J$  = 11.3, 5.8 Hz, 3-H), 4.02 (1H, d,  $J$  = 17.7 Hz, NHCHH), 3.96 (1H, d,  $J$  = 17.7 Hz, NHCHH), 3.53-3.52 (2H, m, CH<sub>2</sub>Ph), 3.47-3.44 (2H, m, CHCH<sub>2</sub>), 3.22 (1H, d,  $J$  = 16.8, 5.8 Hz, 4-HH), 3.01 (1H, d,  $J$  = 16.8, 11.3 Hz, 4-HH), 2.13-2.11 (2H, m, CH<sub>2</sub>H<sub>2</sub>CH<sub>2</sub>); <sup>13</sup>C NMR (126 MHz; CD<sub>3</sub>OD)  $\delta$  172.2, 169.4, 145.5, 144.6, 131.4, 130.6, 130.3, 128.8, 127.2, 127.1, 126.7, 125.6, 124.5, 124.4, 121.6, 120.2, 114.7, 113.0, 61.8, 54.9, 50.6, 34.0, 32.6, 27.7, 27.6.  $m/z$  [ES<sup>+</sup>] 509 ([M+H]<sup>+</sup>, 100%);  $m/z$  [HRMS ES<sup>+</sup>] found [M+H]<sup>+</sup> 509.2606. [C<sub>24</sub>H<sub>37</sub>N<sub>4</sub>O<sub>8</sub>+H]<sup>+</sup> requires 509.2606.

**Leu-enkephalin 2c<sup>2</sup>**

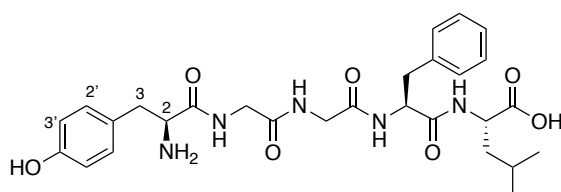



The protected peptide was synthesized according to **Procedure C** using amino acids (4 mmol) as shown in the scheme below. The product was purified by silica gel column chromatography (chloroform/MeOH, 100%/0% to 90%/10%) to give the **protected peptide precursor** as a brown oil (1.6 g, 60%).

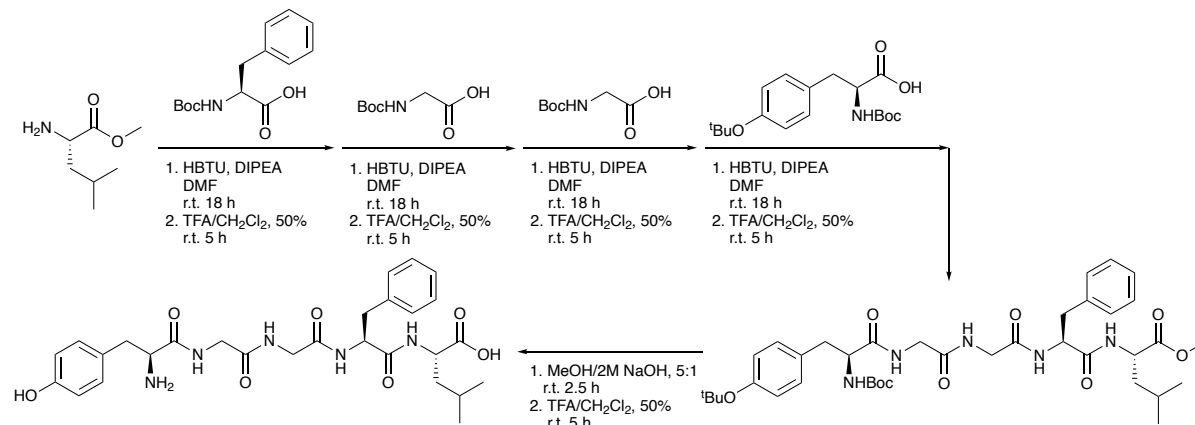

The protected peptide precursor (0.290 g, 0.40 mmol) was then dissolved in 12 mL of a 5:1 mixture of MeOH/2 M NaOH, and the resulting solution was stirred at room temperature for 2.5 h. The product was concentrated and then diluted into 10 mL of water and washed with ether (3 × 10 mL). The aqueous layer was acidified to pH 2 using 1 M HCl and extracted by EtOAc (3 × 10 mL), and the organic layer was concentrated *in vacuo*. The resulting compound was dissolved in CH<sub>2</sub>Cl<sub>2</sub> (5 mL), cooled to 0 °C, and TFA (5 mL) was added. The reaction was stirred at room temperature for 5 h and then concentrated to give the crude product. The crude product was purified by preparative HPLC (**Method 4**, Rt = 17.0 min) to give **2c** as a yellow solid (227 mg, 80% yield). M.p. 136 °C; [ $\alpha$ ]<sub>D</sub><sup>26</sup> -48.7 (c 0.3, CH<sub>3</sub>OH);  $\nu_{\max}$  (neat)/cm<sup>-1</sup> 3335, 3296, 1633; <sup>1</sup>H NMR (600 MHz; CD<sub>3</sub>OD)  $\delta$  7.29-7.18 (5H, m, Ph-H), 7.13 (2H, d, *J* = 8.5 Hz, 3'-H), 6.81 (2H, d, *J* = 8.5 Hz, 2'-H), 4.73 (1H, dd, *J* = 9.6, 4.7 Hz, CHCH<sub>2</sub>Ph), 4.43 (1H, dd, *J* = 8.0, 6.9 Hz, CHCH<sub>2</sub>CH(CH<sub>3</sub>)<sub>2</sub>), 4.09 (1H, dd, *J* = 8.3, 6.2 Hz, 2-H), 3.98 (1H, d, *J* = 16.3 Hz, NHCHH), 3.80 (1H, d, *J* = 16.3 Hz, NHCHH), 3.91 (1H, d, *J* = 16.9 Hz, NHCHH), 3.76 (1H, d, *J* = 16.9 Hz, NHCHH), 3.20-3.17 (2H, m, 3-HH, CHCHHPh), 2.99-2.98 (2H, m, 3-HH, CHCHHPh), 1.74-1.72 (1H, m, CH<sub>2</sub>CH(CH<sub>3</sub>)<sub>2</sub>), 1.67-1.65 (2H, m, CH<sub>2</sub>CH(CH<sub>3</sub>)<sub>2</sub>), 0.97 (3H, d, *J* = 6.3 Hz, CH<sub>2</sub>CHCH<sub>3</sub>(CH<sub>3</sub>)), 0.92 (3H, d, *J* = 6.3 Hz, CH<sub>2</sub>CHCH<sub>3</sub>(CH<sub>3</sub>)); <sup>13</sup>C NMR (176 MHz; CD<sub>3</sub>OD)  $\delta$  175.6, 173.5, 171.3, 170.9, 170.9, 158.2, 138.2, 131.4, 130.3, 129.3, 129.3, 127.6, 125.8, 116.7, 56.0, 55.5, 52.2, 43.8, 43.0, 41.4, 38.8, 37.5, 25.8, 23.2, 21.7. *m/z* [ES<sup>+</sup>] 556 ([M+H]<sup>+</sup>, 100%); *m/z* [HRMS ES<sup>+</sup>] found [M+H]<sup>+</sup> 556.2770. [C<sub>28</sub>H<sub>37</sub>N<sub>5</sub>O<sub>7</sub>+H]<sup>+</sup> requires 556.2766.

**((3S)-1-Benzyl-6,7-dihydroxy-1,2,3,4-tetrahydroisoquinoline-3-carbonyl)glycylglycyl-L-phenylalanyl-L-leucine 4a**

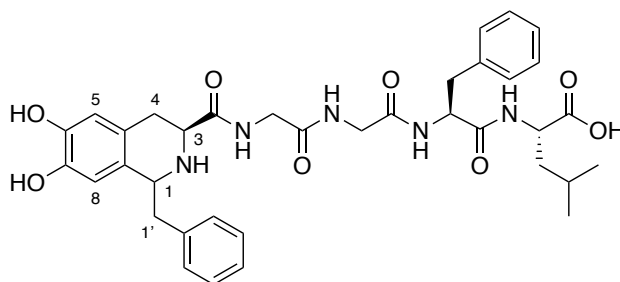

**Compound 4a** (both isomers) was prepared according to **procedure A** using **2c** (55.5 mg, 0.100 mmol) and phenylacetaldehyde (17.5  $\mu$ L, 0.150 mmol). The product was purified by preparative HPLC (**Method 5**,  $R_t$  = 31.0 min) to give **4a** as a white solid (0.3 mg, 4.5% yield) (40% HPLC yield against product standards). M.p. 154  $^{\circ}$ C;  $\nu_{\max}$  (neat)/ $\text{cm}^{-1}$  3336, 3314, 1706, 1620;  $^1\text{H}$  NMR (700 MHz;  $\text{CD}_3\text{OD}$ )  $\delta$  7.40-7.26 (10H, m, Ph-H), 6.81 (1H, s, 5-H), 6.66 (1H, s, 8-H), 4.76 (1H, dd,  $J$  = 8.7, 5.5 Hz,  $\text{CHCH}_2\text{Ph}$ ), 4.68 (1H, dd,  $J$  = 9.5, 4.8 Hz, 1-H), 4.41 (1H, t,  $J$  = 7.4 Hz,  $\text{CHCH}_2\text{CH}(\text{CH}_3)_2$ ), 4.08 (1H, dd,  $J$  = 11.3, 5.9 Hz, 3-H), 3.97 (1H, d,  $J$  = 16.3 Hz,  $\text{NHCHH}$ ), 3.87 (1H, d,  $J$  = 16.3 Hz,  $\text{NHCHH}$ ), 3.76 (1H, d,  $J$  = 17.2 Hz,  $\text{NHCHH}$ ), 3.71 (1H, d,  $J$  = 17.2 Hz,  $\text{NHCHH}$ ), 3.58 (1H, dd,  $J$  = 14.6, 5.5 Hz,  $\text{CHCHHPh}$ ), 3.20-3.10 (4H, m,  $\text{CHCHHPh}$ , 4- $\text{H}_2$ , 1'- $\text{HH}$ ), 2.87 (1H, dd,  $J$  = 14.0, 9.5 Hz, 1'- $\text{HH}$ ), 1.73-1.63 (1H, m,  $\text{CH}(\text{CH}_3)_2$ ), 1.66-1.60 (2H, m,  $\text{CHCH}_2\text{CH}(\text{CH}_3)_2$ ), 0.94 (3H, d,  $J$  = 6.2 Hz,  $\text{CHCH}_3(\text{CH}_3)$ ), 0.89 (3H, d,  $J$  = 6.2 Hz,  $\text{CHCH}_3(\text{CH}_3)$ );  $^{13}\text{C}$  NMR (176 MHz;  $\text{CD}_3\text{OD}$ )  $\delta$  175.6, 173.4, 171.0, 170.9, 146.8, 146.6, 138.6, 138.1, 137.0, 136.7, 130.4, 130.2, 129.7, 128.8, 123.4, 122.9, 116.1, 113.5, 57.4, 55.5, 52.3, 47.8, 41.5, 43.9, 43.4, 40.7, 38.5, 30.4, 25.8, 23.1, 22.0.  $m/z$  [ES $^+$ ] 674 ([ $\text{M}+\text{H}$ ] $^+$ , 100%);  $m/z$  [HRMS ES $^+$ ] found [ $\text{M}+\text{H}$ ] $^+$  674.3186. [ $\text{C}_{36}\text{H}_{43}\text{N}_5\text{O}_8+\text{H}$ ] $^+$  requires 674.3184.

**((3S)-6,7-Dihydroxy-1-phenyl-1,2,3,4-tetrahydroisoquinoline-3-carbonyl)glycylglycyl-L-phenylalanyl-L-leucine 4b**

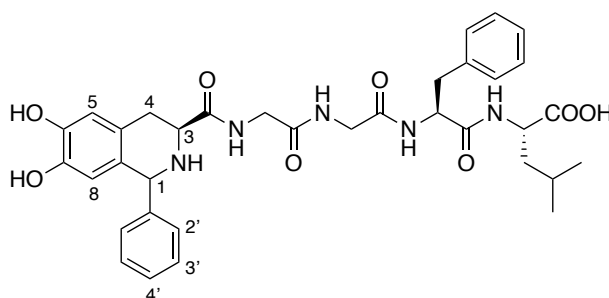

**Compound 4b** (both isomers) was prepared according to **procedure A** using **2c** (55.5 mg, 0.100 mmol) and benzaldehyde (15.3  $\mu$ L, 0.150 mmol). The product was purified by preparative HPLC (**Method 5**,  $R_t$  = 30.9 min) to give **4b** as a white solid (1.1 mg, 20% yield) (50% HPLC yield against product standards). M.p. 130  $^{\circ}$ C;  $\nu_{\max}$  (neat)/ $\text{cm}^{-1}$  3311, 1707, 1637; (1*R*,3*S*) (70% ratio):  $^1\text{H}$  NMR (700 MHz;  $\text{CD}_3\text{OD}$ )  $\delta$  7.27-7.24 (10H, m, Ph-H), 6.70 (1H, s, 5-H), 6.11 (1H, s, 8-H), 5.64 (1H, s, 1-H), 4.65 (1H, dd,  $J$  = 9.3, 4.0 Hz,  $\text{CHCH}_2\text{Ph}$ ), 4.43 (1H, t,

$J = 7.4$  Hz,  $\text{CHCH}_2\text{CH}(\text{CH}_3)_2$ ), 4.27 (1H, dd,  $J = 11.7, 5.3$  Hz, 3-H), 3.96 (1H, d,  $J = 16.3$  Hz,  $\text{NHCHH}$ ), 3.89 (1H, d,  $J = 17.0$  Hz,  $\text{NHCHH}$ ), 3.81 (1H, d,  $J = 16.3$  Hz,  $\text{NHCHH}$ ), 3.62 (1H, d,  $J = 17.0$  Hz,  $\text{NHCHH}$ ), 3.36-3.32 (1H, m, 4- $\text{HH}$ ), 3.20-3.14 (2H, m,  $\text{CHCHHPH}$ , 4- $\text{HH}$ ), 2.84 (1H, dd,  $J = 14.0, 9.3$  Hz,  $\text{CHCHHPH}$ ), 1.75-1.65 (1H, m,  $\text{CH}_2\text{CH}(\text{CH}_3)_2$ ), 1.68-1.58 (2H, m,  $\text{CHCH}_2\text{CH}(\text{CH}_3)_2$ ), 0.95 (3H, d,  $J = 6.4$  Hz,  $\text{CHCH}_3(\text{CH}_3)$ ), 0.91 (3H, d,  $J = 6.4$  Hz,  $\text{CHCH}_3(\text{CH}_3)$ );  $^{13}\text{C}$  NMR (176 MHz;  $\text{CD}_3\text{OD}$ )  $\delta$  175.5, 175.4, 173.5, 171.0, 170.6, 147.6, 146.4, 138.3, 137.4, 131.5, 131.3, 130.3, 129.7, 128.4, 127.7, 122.5, 121.1, 115.5, 114.7, 59.6, 55.7, 52.2, 51.6, 43.9, 42.7, 41.5, 38.6, 30.2, 25.6, 23.2, 21.7. (1S,3S) (30% ratio):  $^1\text{H}$  NMR (700 MHz;  $\text{CD}_3\text{OD}$ )  $\delta$  7.27-7.24 (10H, m, Ph-H), 6.70 (1H, s, 5-H), 6.11 (1H, s, 8-H), 5.64 (1H, s, 1-H), 4.70 (1H, dd,  $J = 9.8, 4.6$  Hz,  $\text{CHCH}_2\text{Ph}$ ), 4.47-4.45 (1H, m, 3-H), 4.44-4.42 (1H, m,  $\text{CHCH}_2\text{CH}(\text{CH}_3)_2$ ), 4.06 (1H, d,  $J = 16.3$  Hz,  $\text{NHCHH}$ ), 4.00 (1H, d,  $J = 17.0$  Hz,  $\text{NHCHH}$ ), 3.96 (1H, d,  $J = 16.3$  Hz,  $\text{NHCHH}$ ), 3.89 (1H, d,  $J = 17.0$  Hz,  $\text{NHCHH}$ ), 3.38-3.30 (1H, m, 4- $\text{HH}$ ), 3.19-3.15 (1H, m,  $\text{CHCHHPH}$ ), 2.97-2.92 (2H, m, 4- $\text{HH}$ ,  $\text{CHCHHPH}$ ), 1.72-1.68 (1H, m,  $\text{CH}_2\text{CH}(\text{CH}_3)_2$ ), 1.65-1.60 (2H, m,  $\text{CHCH}_2\text{CH}(\text{CH}_3)_2$ ), 0.95 (3H, d,  $J = 6.4$  Hz,  $\text{CHCH}_3(\text{CH}_3)$ ), 0.91 (3H, d,  $J = 6.4$  Hz,  $\text{CHCH}_3(\text{CH}_3)$ );  $^{13}\text{C}$  NMR (176 MHz;  $\text{CD}_3\text{OD}$ )  $\delta$  175.9, 175.5, 173.5, 171.2, 170.9, 146.3, 146.2, 138.4, 131.4, 130.9, 130.7, 130.4, 130.3, 129.7, 128.4, 127.6, 123.9, 123.5, 115.5, 115.3, 63.2, 55.8, 55.7, 52.1, 44.0, 41.5, 41.3, 38.2, 30.2, 25.8, 23.2, 21.7.  $m/z$  [ES+] 660 ( $[\text{M}+\text{H}]^+$ , 100%);  $m/z$  [HRMS ES+] found  $[\text{M}+\text{H}]^+$  660.3029.  $[\text{C}_{35}\text{H}_{41}\text{N}_5\text{O}_8+\text{H}]^+$  requires 660.3028.

**((3S)-1-(4-Chlorophenyl)-6,7-dihydroxy-1,2,3,4-tetrahydroisoquinoline-3-carbonyl)glycylglycyl-L-phenylalanyl-L-leucine 4c**

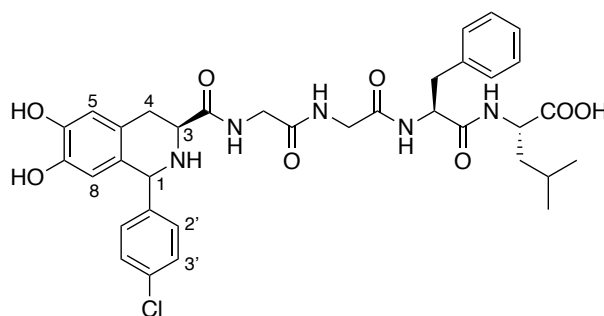

**Compound 4c** (both isomers) was prepared according to **procedure A** using **2c** (55.5 mg, 0.100 mmol) and 4-bromobenzaldehyde (23.8 mg, 0.150 mmol). The product was purified by preparative HPLC (**Method 5**,  $R_t = 32.4$  min) to give **4c** as a white solid (0.7 mg, 10% yield) (25% HPLC yield against product standards). M.p. 142 °C;  $\nu_{\text{max}}$  (neat)/ $\text{cm}^{-1}$  3326, 3277, 1639, 987; (1R,3S) (70% ratio):  $^1\text{H}$  NMR (700 MHz;  $\text{CD}_3\text{OD}$ )  $\delta$  7.46 (2H, d,  $J = 8.5$  Hz, 3'-H), 7.33 (2H, d,  $J = 8.5$  Hz, 2'-H), 7.26-7.12 (5H, m, Ph-H), 6.73 (1H, s, 5-H), 6.37 (1H, s, 8-H), 5.75 (1H, s, 1-H), 4.70 (1H, dd,  $J = 9.8, 4.5$  Hz,  $\text{CHCH}_2\text{Ph}$ ), 4.40 (1H, t,  $J = 7.4$  Hz,  $\text{CHCH}_2\text{CH}(\text{CH}_3)_2$ ), 4.21 (1H, dd,  $J = 11.7, 5.2$  Hz, 3-H), 3.96 (1H, d,  $J = 16.3$  Hz,  $\text{NHCHH}$ ),

3.89 (1H, d,  $J = 17.0$  Hz, NHCHH), 3.81 (1H, d,  $J = 16.3$  Hz, NHCHH), 3.62 (1H, d,  $J = 17.0$  Hz, NHCHH), 3.34-3.30 (1H, m, 4-HH), 3.20-3.14 (2H, m, CHCHHPh, 4-HH), 2.99 (1H, dd,  $J = 14.0, 9.8$  Hz, CHCHHPh), 1.71-1.69 (1H, m, CH<sub>2</sub>CH(CH<sub>3</sub>)<sub>2</sub>), 1.66-1.60 (2H, m, CHCH<sub>2</sub>CH(CH<sub>3</sub>)<sub>2</sub>), 0.95 (3H, d,  $J = 6.2$  Hz, CHCH<sub>3</sub>(CH<sub>3</sub>)), 0.91 (3H, d,  $J = 6.2$  Hz, CHCH<sub>3</sub>(CH<sub>3</sub>)); <sup>13</sup>C NMR (176 MHz; CD<sub>3</sub>OD)  $\delta$  175.5, 173.3, 171.4, 171.3, 171.0, 147.3, 146.8, 138.3, 136.6, 133.3, 133.2, 130.3, 129.5, 122.1, 121.5, 115.6, 114.8, 58.8, 55.4, 52.2, 51.9, 43.6, 42.9, 41.3, 38.7, 30.3, 25.7, 23.3, 22.1. (1*S*,3*S*) (30% ratio): <sup>1</sup>H NMR (700 MHz; CD<sub>3</sub>OD)  $\delta$  7.50 (2H, d,  $J = 8.4$  Hz, 3'-H), 7.45 (d,  $J = 8.4$  Hz, 2'-H), 7.26-7.12 (5H, m, Ph-H), 6.70 (1H, s, 5-H), 6.09 (1H, s, 8-H), 5.65 (1H, s, 1-H), 4.67 (1H, dd,  $J = 8.6, 6.0$  Hz, CHCH<sub>2</sub>Ph), 4.43 (1H, dd,  $J = 11.6, 5.5$  Hz, 3-H), 4.36 (1H, dd,  $J = 8.8, 5.9$  Hz, CHCH<sub>2</sub>CH(CH<sub>3</sub>)<sub>2</sub>), 3.98 (1H, d,  $J = 16.3$  Hz, NHCHH), 3.88 (1H, d,  $J = 16.3$  Hz, NHCHH), 3.86 (1H, d,  $J = 16.8$  Hz, NHCHH), 3.79 (1H, d,  $J = 16.8$  Hz, NHCHH), 3.33-3.31 (2H, m, 4-H<sub>2</sub>), 3.09 (1H, dd,  $J = 13.9, 6.0$  Hz, CHCHHPh), 2.87 (1H, dd,  $J = 13.9, 8.6$  Hz, CHCHHPh), 1.71-1.69 (1H, m, CH<sub>2</sub>CH(CH<sub>3</sub>)<sub>2</sub>), 1.62-1.58 (2H, m, CHCH<sub>2</sub>CH(CH<sub>3</sub>)<sub>2</sub>), 0.93 (3H, d,  $J = 6.2$  Hz, CHCH<sub>3</sub>(CH<sub>3</sub>)), 0.89 (3H, d,  $J = 6.2$  Hz, CHCH<sub>3</sub>(CH<sub>3</sub>)); <sup>13</sup>C NMR (176 MHz; CD<sub>3</sub>OD)  $\delta$  175.5, 174.4, 173.8, 171.1, 170.8, 146.8, 146.7, 138.0, 136.8, 136.7, 133.6, 133.1, 132.7, 130.5, 130.3, 129.8, 127.7, 123.6, 123.5, 116.3, 115.1, 62.3, 58.2, 55.5, 52.3, 44.1, 42.9, 41.5, 39.0, 30.3, 25.7, 23.2, 21.7. *m/z* [ES<sup>+</sup>] 694 ([M+H]<sup>+</sup>, 100%); *m/z* [HRMS ES<sup>+</sup>] found [M+H]<sup>+</sup> 694.2632. [C<sub>35</sub>H<sub>40</sub>N<sub>5</sub>O<sub>8</sub><sup>35</sup>Cl+H]<sup>+</sup> requires 694.2638.

**((3*S*)-1-(4-Bromophenyl)-6,7-dihydroxy-1,2,3,4-tetrahydroisoquinoline-3-carbonyl)glycylglycyl-L-phenylalanyl-L-leucine 4d**

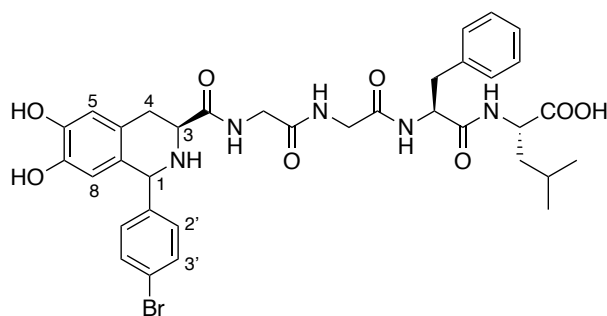

**Compound 4d** (both isomers) was prepared according to **procedure A** using **2c** (55.5 mg, 0.100 mmol) and 4-bromobenzaldehyde (27.7 mg, 0.150 mmol). The product was purified by preparative HPLC (**Method 5**, *Rt* = 32.9 min) to give **4d** as a white solid (1.4 mg, 20% yield) (36% HPLC yield against product standards). M.p. 165 °C;  $\nu_{\text{max}}$  (neat)/cm<sup>-1</sup> 3325, 1638, 987; (1*R*,3*S*) (83% ratio): <sup>1</sup>H NMR (700 MHz; CD<sub>3</sub>OD)  $\delta$  7.62 (2H, d,  $J = 8.3$  Hz, 3'-H), 7.26 (2H, d,  $J = 8.3$  Hz, 2'-H), 7.26-7.11 (5H, m, Ph-H), 6.73 (1H, s, 5-H), 6.37 (1H, s, 8-H), 5.75 (1H, s, 1-H), 4.70 (1H, dd,  $J = 9.9, 4.6$  Hz, CHCH<sub>2</sub>Ph), 4.40 (1H, t,  $J = 7.3$  Hz, CHCH<sub>2</sub>CH(CH<sub>3</sub>)<sub>2</sub>), 4.22 (1H, dd,  $J = 11.8, 5.2$  Hz, 3-H), 3.96 (1H, d,  $J = 16.3$  Hz, NHCHH), 3.88 (1H, d,  $J = 17.0$  Hz,

NHCHH), 3.82 (1H, d,  $J = 16.3$  Hz, NHCHH), 3.64 (1H, d,  $J = 17.0$  Hz, NHCHH), 3.33-3.31 (1H, m, 4-HH), 3.16-3.13 (2H, m, 4-HH, CHCHHPH), 2.99 (1H, dd,  $J = 14.0, 9.9$  Hz, CHCHHPH), 1.69-1.67 (1H, m,  $\text{CH}_2\text{CH}(\text{CH}_3)_2$ ) 1.66-1.61 (2H, m,  $\text{CHCH}_2\text{CH}(\text{CH}_3)_2$ ), 0.96 (3H, d,  $J = 6.2$  Hz,  $\text{CHCH}_3(\text{CH}_3)$ ), 0.88 (3H, d,  $J = 6.2$  Hz,  $\text{CHCH}_3(\text{CH}_3)$ );  $^{13}\text{C}$  NMR (176 MHz;  $\text{CD}_3\text{OD}$ )  $\delta$  175.4, 173.7, 171.3, 171.1, 170.7, 147.0, 146.9, 138.2, 138.1, 136.8, 133.5, 133.4, 133.3, 133.2, 130.2, 129.7, 127.6, 122.7, 121.4, 115.5, 114.8, 58.8, 55.3, 52.3, 51.7, 43.7, 42.7, 41.3, 38.7, 30.1, 25.7, 23.3, 21.7. (1S,3S) (17% ratio):  $^1\text{H}$  NMR (700 MHz;  $\text{CD}_3\text{OD}$ )  $\delta$  7.66 (2H, d,  $J = 8.3$  Hz, 3'-H), 7.39 (2H, d,  $J = 8.3$  Hz, 2'-H), 7.26-7.11 (5H, m, Ph-H), 6.71 (1H, s, 5-H), 6.09 (1H, s, 8-H), 5.67 (1H, s, 1-H), 4.68 (1H, dd,  $J = 8.7, 6.3$  Hz,  $\text{CHCH}_2\text{Ph}$ ), 4.46 (1H, dd,  $J = 11.9, 5.5$  Hz, 3-H), 4.37 (1H, dd,  $J = 8.8, 5.9$  Hz,  $\text{CHCH}_2\text{CH}(\text{CH}_3)_2$ ), 4.00 (1H, d,  $J = 16.3$  Hz, NHCHH), 3.89 (1H, d,  $J = 16.3$  Hz, NHCHH), 3.85 (1H, d,  $J = 17.0$  Hz, NHCHH), 3.81 (1H, d,  $J = 17.0$  Hz, NHCHH), 3.33-3.31 (2H, m, 4-H<sub>2</sub>), 3.07 (1H, dd,  $J = 13.9, 6.3$  Hz, CHCHHPH), 2.85 (1H, dd,  $J = 13.9, 8.7$  Hz, CHCHHPH), 1.69-1.67 (1H, m,  $\text{CH}_2\text{CH}(\text{CH}_3)_2$ ) 1.66-1.64 (2H, m,  $\text{CHCH}_2\text{CH}(\text{CH}_3)_2$ ), 0.93 (3H, d,  $J = 6.2$  Hz,  $\text{CHCH}_3(\text{CH}_3)$ ), 0.89 (3H, d,  $J = 6.2$  Hz,  $\text{CHCH}_3(\text{CH}_3)$ );  $^{13}\text{C}$  NMR (176 MHz;  $\text{CD}_3\text{OD}$ )  $\delta$  176.1, 175.4, 173.7, 171.2, 171.1, 146.5, 146.4, 138.2, 138.1, 136.8, 133.5, 133.4, 133.3, 133.2, 130.2, 129.7, 127.6, 123.9, 122.9, 115.5, 114.8, 62.4, 57.8, 55.4, 52.2, 43.9, 43.5, 41.3, 38.7, 30.2, 25.7, 23.3, 21.7.  $m/z$  [ES<sup>+</sup>] 738 ([M+H]<sup>+</sup>, 100%);  $m/z$  [HRMS ES<sup>+</sup>] found [M+H]<sup>+</sup> 738.2133. [ $\text{C}_{35}\text{H}_{40}\text{N}_5\text{O}_8^{79}\text{Br}+\text{H}$ ]<sup>+</sup> requires 738.2128.

**((3S)-1-(2-Bromophenyl)-6,7-dihydroxy-1,2,3,4-tetrahydroisoquinoline-3-carbonyl)glycylglycyl-L-phenylalanyl-L-leucine 4e**

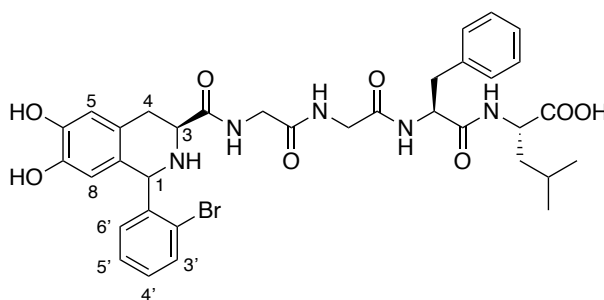

**Compound 4e** (both isomers) was prepared according to **procedure A** using **2c** (55.5 mg, 0.100 mmol) and 4-bromobenzaldehyde (27.7 mg, 0.150 mmol). The product was purified by preparative HPLC (**Method 5**,  $R_t = 31.4$  min) to give **4e** as a white solid (1.5 mg, 20% yield) (77% HPLC yield against product standards). M.p. 150 °C;  $\nu_{\text{max}}$  (neat)/ $\text{cm}^{-1}$  3334, 3294, 1639, 987; (1R,3S) (50% ratio):  $^1\text{H}$  NMR (700 MHz;  $\text{CD}_3\text{OD}$ )  $\delta$  7.26-7.16 (9H, m, Ph-H), 6.73 (1H, s, 5-H), 6.23 (1H, s, 8-H), 6.15 (1H, s, 1-H), 4.68-4.64 (1H, m,  $\text{CHCH}_2\text{Ph}$ ), 4.43 (1H, t,  $J = 7.4$  Hz,  $\text{CHCH}_2\text{CH}(\text{CH}_3)_2$ ), 4.23 (1H, dd,  $J = 11.5, 4.8$  Hz, 3-H), 4.02-3.73 (4H, m,  $\text{NHCH}_2, \text{NHCH}_2$ ), 3.40-3.36 (1H, m, 4-HH), 3.15-3.11 (2H, m, 4-HH, CHCHHPH), 2.94-2.90 (1H, m, CHCHHPH),

1.71-1.69 (1H, m, CH<sub>2</sub>CH(CH<sub>3</sub>)<sub>2</sub>), 1.66-1.63 (2H, m, CHCH<sub>2</sub>CH(CH<sub>3</sub>)<sub>2</sub>), 0.95 (3H, d, *J* = 6.2 Hz, CHCH<sub>3</sub>(CH<sub>3</sub>)), 0.86 (3H, d, *J* = 6.2 Hz, CHCH<sub>3</sub>(CH<sub>3</sub>)); <sup>13</sup>C NMR (176 MHz; CD<sub>3</sub>OD) δ 173.9, 172.3, 171.7, 169.8, 146.1, 145.4, 137.0, 135.6, 132.3, 128.7, 128.3, 126.3, 126.2, 122.0, 119.8, 114.1, 113.2, 57.3, 54.2, 50.8, 50.6, 42.3, 41.8, 40.1, 37.3, 29.0, 24.5, 21.8, 20.3. (1*R*,3*S*) (50% ratio): <sup>1</sup>H NMR (700 MHz; CD<sub>3</sub>OD) δ 7.26-7.16 (9H, m, Ph-H), 6.70 (1H, s, 5-H), 6.14 (1H, s, 1-H), 6.00 (1H, s, 8-H), 4.68-4.64 (1H, m, CHCH<sub>2</sub>Ph), 4.58 (1H, dd, *J* = 10.7, 6.9 Hz, 3-H), 4.32 (1H, dd, *J* = 9.8, 4.5 Hz, CHCH<sub>2</sub>CH(CH<sub>3</sub>)<sub>2</sub>), 4.02-3.73 (4H, m, NHCH<sub>2</sub>, NHCH<sub>2</sub>), 3.40-3.36 (2H, m, 4-H<sub>2</sub>), 3.15-3.11 (1H, m, CHCHHPh), 2.84 (1H, dd, *J* = 14.0, 9.4 Hz, CHCHHPh), 1.72-1.70 (1H, m, CH<sub>2</sub>CH(CH<sub>3</sub>)<sub>2</sub>), 1.65-1.62 (2H, m, CHCH<sub>2</sub>CH(CH<sub>3</sub>)<sub>2</sub>), 0.95-0.90 (6H, m, CH(CH<sub>3</sub>)<sub>2</sub>); <sup>13</sup>C NMR (176 MHz; CD<sub>3</sub>OD) δ 173.9, 172.3, 171.7, 169.8, 146.1, 145.4, 137.0, 135.6, 132.3, 128.7, 128.3, 126.3, 126.2, 122.0, 119.8, 114.5, 113.2, 60.6, 57.3, 54.2, 50.8, 42.3, 41.8, 40.1, 37.3, 29.0, 24.5, 20.3. *m/z* [ES<sup>+</sup>] 738 ([M+H]<sup>+</sup>, 100%); *m/z* [HRMS ES<sup>+</sup>] found [M+H]<sup>+</sup> 738.2128. [C<sub>35</sub>H<sub>40</sub>N<sub>5</sub>O<sub>8</sub><sup>79</sup>Br+H]<sup>+</sup> requires 738.2133.

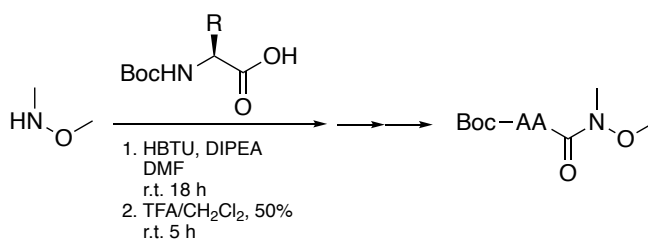

*N,O*-Dimethylhydroxylamine hydrochloride (97 mg, 1.0 mmol) and amino acids (1.1 mmol) were used to prepare Boc-amino acid Weinreb amides according to **Procedure C**.

### ***tert*-Butyl ((*S*)-3-methyl-1-oxo-1-(((*S*)-1-oxopropan-2-yl)amino)butan-2-yl)carbamate **5a****

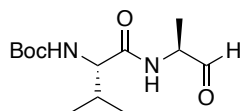

The corresponding Weinreb amide (66.2 mg, 0.200 mmol) was dissolved in anhydrous THF (10 mL), cooled to 0 °C. LiAlH<sub>4</sub> (0.3 mL, 0.7 mmol) was added dropwise. The reaction was stirred at 0 °C for 30 min, then quenched with brine (10 mL), filtered, and concentrated *in vacuo*. The product was then extracted with EtOAc (3 x 10 mL), filtered, and concentrated *in vacuo* to give **5a** (21.8 mg, 50%) as a pale-yellow oil. *R*<sub>f</sub> = 0.3 (hexane/ethyl acetate, 1:1); *v*<sub>max</sub> (neat)/cm<sup>-1</sup> 3332, 1630, 1418; <sup>1</sup>H NMR (600 MHz; CDCl<sub>3</sub>) δ 9.54 (1H, d, *J* = 3.3 Hz, CHO), 5.01 (1H, m, CHCH(CH<sub>3</sub>)<sub>2</sub>), 3.96 (1H, m, CHCH<sub>3</sub>), 2.16 (1H, m, CHCH(CH<sub>3</sub>)<sub>2</sub>), 1.44 (9H, s, Boc-H), 1.37 (3H, d, *J* = 7.4 Hz, CHCH<sub>3</sub>), 0.97 (3H, d, *J* = 6.8 Hz, CHCH<sub>3</sub>(CH<sub>3</sub>)), 0.92 (3H, d, *J* = 6.8 Hz, CHCH<sub>3</sub>(CH<sub>3</sub>)); <sup>13</sup>C NMR (176 MHz; CDCl<sub>3</sub>) δ 174.1, 173.2, 157.3, 81.0, 61.6, 57.2,

31.9, 28.7, 19.6, 18.3, 14.5.  $m/z$  [ES+] 273 ( $[M+H]^+$ , 100%);  $m/z$  [HRMS ES+] found  $[M+H]^+$  273.1807.  $[C_{13}H_{24}N_2O_4+H]^+$  requires 273.1808.

**tert-Butyl ((S)-1-oxo-1-(((S)-1-oxopropan-2-yl)amino)-3-phenylpropan-2-yl)carbamate 5b**

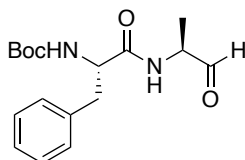

The corresponding Weinreb amide (prepared according to **Procedure C**, 38 mg, 0.10 mmol) was added in anhydrous THF (5 mL) and cooled to 0 °C under argon. Lithium aluminium hydride (0.1 mL, 0.2 mmol) was added drop wise, and the reaction was stirred at 0 °C for 30 min. The reaction was quenched with the addition of brine (5 mL), filtered, and concentrated *in vacuo*, resuspended in H<sub>2</sub>O (5 mL). The aqueous layer was extracted with EtOAc (3 x 10 mL), and the organic layer was concentrated to give **5b** as a yellow oil (25 mg, 80%).  $R_f$  = 0.3 (hexane/ethyl acetate, 1:1); IR  $\nu_{max}$  (solution in CH<sub>3</sub>OH)/cm<sup>-1</sup> 2944, 1442; <sup>1</sup>H NMR (700 MHz; CDCl<sub>3</sub>)  $\delta$  9.41 (1H, s, CHO), 7.30-7.25 (5H, m, Ph-H), 4.40-3.37 (1H, m, CHCH<sub>3</sub>), 4.39-3.38 (1H, m, CHCH<sub>2</sub>Ph), 3.12 (1H, dd,  $J$  = 14.0, 6.8 Hz, CHCHHPh), 3.04 (1H, dd,  $J$  = 14.0, 6.8 Hz, CHCHHPh), 1.42 (9H, s, Boc-H), 1.29 (3H, d,  $J$  = 7.5 Hz, CHCH<sub>3</sub>); <sup>13</sup>C NMR (176 MHz, CD<sub>3</sub>OD)  $\delta$  209.8, 173.5, 172.8, 138.6, 130.3, 130.3, 129.3, 80.5, 57.4, 50.3, 39.2, 28.6, 14.4.  $m/z$  [ES+] 321 ( $[M+H]^+$ , 100%).  $m/z$  [HRMS ES+] found  $[M+H]^+$  321.1804.  $[C_{17}H_{24}N_2O_4+H]^+$  requires 321.1808.

**tert-Butyl (1-(((S)-3-methyl-1-oxo-1-(((S)-1-oxopropan-2-yl)amino)butan-2-yl)amino)-1-oxo-3-phenylpropan-2-yl)carbamate 5c**

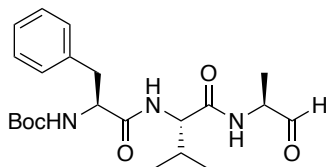

The corresponding Weinreb amide (prepared according to **Procedure C**, 53 mg, 0.10 mmol) was added in anhydrous THF (5 mL) and cooled to 0 °C under argon. Lithium aluminium hydride (0.17 mL, 0.30 mmol) was added drop wise, and the reaction was stirred at 0 °C for 30 min. The reaction was quenched with the addition of brine (5 mL), filtered, and concentrated *in vacuo*, resuspended in H<sub>2</sub>O (5 mL). The aqueous layer was extracted with EtOAc (3 x 10 mL), and the organic layer was concentrated to give **5c** as a colorless oil (12 mg, 30%).  $R_f$  = 0.5 (hexane/ethyl acetate, 1:2);  $\nu_{max}$  (solution in CH<sub>3</sub>OH)/cm<sup>-1</sup> 3692, 1650; <sup>1</sup>H NMR (500 MHz; CD<sub>3</sub>OD)  $\delta$  9.44 (1H, s, CHO), 7.26-7.22 (5H, m, Ph-H), 4.35 (1H, dd,  $J$  = 9.4, 5.1 Hz,

CHCH<sub>2</sub>Ph), 4.18-4.16 (1H, m, CHCH(CH<sub>3</sub>)<sub>2</sub>), 3.91 (1H, d, *J* = 6.7 Hz, CHCH<sub>3</sub>), 3.12 (1H, dd, *J* = 13.9, 5.1 Hz, CHCHHPPh), 2.81 (1H, dd, *J* = 13.9, 9.4 Hz, CHCHHPPh), 2.05-2.02 (1H, m, CHCH(CH<sub>3</sub>)<sub>2</sub>), 1.36 (9H, s, Boc-H), 1.13 (3H, s, CHCH<sub>3</sub>), 0.99-0.95 (6H, m, CH(CH<sub>3</sub>)<sub>2</sub>). <sup>13</sup>C NMR (176 MHz, CD<sub>3</sub>OD) δ 182.9, 175.5, 172.7, 159.6, 138.5, 130.3, 129.5, 127.6, 80.5, 59.8, 57.3, 50.5, 38.8, 32.3, 28.4, 19.5, 14.4. *m/z* [ES<sup>+</sup>] 420 ([M+H]<sup>+</sup>, 100%); *m/z* [HRMS ES<sup>+</sup>] found [M+H]<sup>+</sup> 420.2480. [C<sub>22</sub>H<sub>33</sub>N<sub>3</sub>O<sub>5</sub>+H]<sup>+</sup> requires 420.2493.

**((3S)-1-((S)-1-((S)-2-((*tert*-Butoxycarbonyl)amino)-3-methylbutanamido)ethyl)-6,7-dihydroxy-1,2,3,4-tetrahydroisoquinoline-3-carbonyl)glycine 6a**

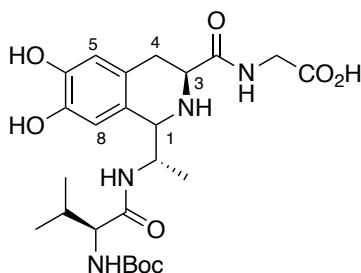

**Compound 6a** (both isomers) were prepared using L-DOPA-Gly (25.4 mg, 0.100 mmol, afforded from **2b** according to **Procedure D**), Boc-Val-Ala-H (37.5 mg, 0.150 mmol) and sodium ascorbate (40 mg, 0.20 mmol) in 0.2 M KPi/DMSO (1:1, 10 mL), at 50 °C, 24 h. The product was purified by preparative HPLC (**Method 4**, Rt = 20.0 min) to give **6a** as a white solid (5 mg, 9% yield) (48% HPLC yield against product standards). M.p. 126 °C;  $\nu_{\max}$  (neat)/cm<sup>-1</sup> 3066, 1666, 1189, 721; <sup>1</sup>H NMR (700 MHz; CD<sub>3</sub>OD) δ 6.65 (1H, s, 5-H), 6.64 (1H, s, 8-H), 4.66 (1H, dd, *J* = 9.3, 6.5 Hz, 3-H), 4.33 (1H, d, *J* = 8.8 Hz, 1-H), 4.29-2.26 (1H, m, CHCH<sub>3</sub>), 4.07 (1H, d, *J* = 17.6 Hz, NHCHH), 3.89 (1H, d, *J* = 17.6 Hz, NHCHH), 3.75 (1H, d, *J* = 5.9 Hz, CHCH(CH<sub>3</sub>)<sub>2</sub>), 3.35 (1H, dd, *J* = 17.1, 6.5 Hz, 4-HH), 3.07 (1H, dd, *J* = 17.1, 9.3 Hz, 4-HH), 2.08-2.04 (1H, m, CHCH(CH<sub>3</sub>)<sub>2</sub>), 1.47 (9H, s, Boc-H), 1.31 (3H, d, *J* = 6.9 Hz, CHCH<sub>3</sub>), 0.95 (3H, d, *J* = 6.8 Hz, CHCH<sub>3</sub>(CH<sub>3</sub>)), 0.93 (d, *J* = 6.8 Hz, 3H, CHCH<sub>3</sub>(CH<sub>3</sub>)). <sup>13</sup>C NMR (176 MHz; CD<sub>3</sub>OD) δ 176.3, 175.6, 171.4, 168.5, 147.1, 146.2, 122.5, 120.3, 116.4, 116.1, 81.8, 62.5, 61.0, 52.9, 48.6, 41.8, 31.2, 30.9, 28.6, 19.2, 17.7. *m/z* [ES<sup>+</sup>] 509 ([M+H]<sup>+</sup>, 100%); *m/z* [HRMS ES<sup>+</sup>] found [M+H]<sup>+</sup> 509.2606. [C<sub>24</sub>H<sub>37</sub>N<sub>4</sub>O<sub>8</sub>+H]<sup>+</sup> requires 509.2606.

**((3S)-1-((S)-1-((S)-2-((*tert*-butoxycarbonyl)amino)-3-phenylpropanamido)ethyl)-6,7-dihydroxy-1,2,3,4-tetrahydroisoquinoline-3-carbonyl)glycine 6b**



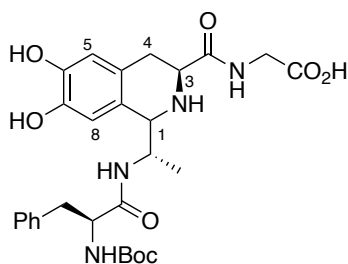

**Compound 6b** was prepared using L-DOPA-Gly-OH (25.4 mg, 0.100 mmol, afforded from **2b** according to **Procedure D**), Boc-Phe-Ala-H (26 mg, 0.10 mmol) and sodium ascorbate (40 mg, 0.20 mmol) in 0.2 M KPi/MeOH/EtOAc (5:3:2, 10 mL), at 50 °C, 18 h. The product was purified by preparative HPLC (**Method 4**, Rt = 22.7 min) to give **6b** as a white solid (5 mg, 8% yield) (35% HPLC yield against product standards). M.p. 154 °C;  $\nu_{\max}$  (solution in CH<sub>3</sub>OH)/cm<sup>-1</sup> 3324, 2944, 1650, 1412; <sup>1</sup>H NMR (700 MHz; CD<sub>3</sub>OD)  $\delta$  7.28-7.17 (5H, m, Ph-H), 6.62 (1H, s, 5-H), 6.59 (1H, s, 8-H), 4.58-4.55 (1H, m, 3-H), 4.22 (1H, d, *J* = 8.9 Hz, 1-H), 4.10-4.09 (1H, m, CHCH<sub>3</sub>), 4.08-4.07 (1H, m, CHCH<sub>2</sub>Ph), 4.01-3.92 (2H, m, NHCH<sub>2</sub>), 3.07-2.89 (2H, m, 4-H<sub>2</sub>), 2.54 (2H, d, *J* = 8.5 Hz, CHCH<sub>2</sub>Ph), 1.39 (9H, s, Boc-H), 1.18 (3H, d, *J* = 7.0 Hz, CHCH<sub>3</sub>); <sup>13</sup>C NMR (176 MHz; CD<sub>3</sub>OD)  $\delta$  175.7, 175.6, 171.6, 170.1, 146.3, 146.2, 130.1, 129.4, 129.5, 127.6, 120.4, 120.3, 116.1, 116.0, 80.8, 60.9, 58.0, 52.9, 48.7, 41.8, 38.3, 30.9, 28.4, 17.3. *m/z* [ES<sup>+</sup>] 557 ([M+H]<sup>+</sup>, 100%); *m/z* [HRMS ES<sup>+</sup>] found [M+H]<sup>+</sup> 557.2610. [C<sub>28</sub>H<sub>37</sub>N<sub>4</sub>O<sub>8</sub>+H]<sup>+</sup> requires 557.2606.

**((3S)-1-((S)-1-((S)-2-((S)-2-((tert-Butoxycarbonyl)amino)-3-phenylpropanamido)-3-methylbutanamido)ethyl)-6,7-dihydroxy-1,2,3,4-tetrahydroisoquinoline-3-carbonyl)glycine 6c**

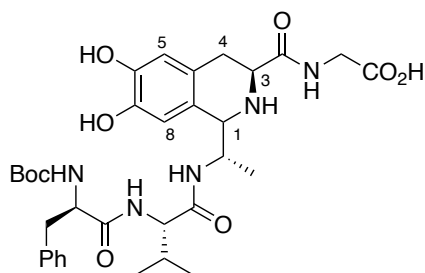

**Compound 6c** was prepared using L-DOPA-Gly-OH (25.4 mg, 0.100 mmol, afforded from **2b** according to **Procedure D**), Boc-Phe-Val-Ala-H (42 mg, 0.10 mmol) and sodium ascorbate (40 mg, 0.20 mmol) in 0.2 M KPi/MeOH/EtOAc (5:3:2, 10 mL), at 50 °C, 18 h. The product was purified by preparative HPLC (**Method 4**, Rt = 21.9 min) to give **6c** as a white solid (6 mg, 9% yield) (35% HPLC yield against product standards). M.p. 165 °C;  $\nu_{\max}$  (solution in CH<sub>3</sub>OH)/cm<sup>-1</sup> 3002, 2944, 1650; <sup>1</sup>H NMR (500 MHz; CD<sub>3</sub>OD)  $\delta$  7.29-6.96 (5H, m, Ph-H), 6.91-6.60 (2H, m, 5-H, 8-H), 4.72-4.63 (1H, m, CHCH<sub>2</sub>Ph), 4.54-4.43 (1H, m, 1-H), 4.35-4.28 (1H, m, 3-H), 4.26-4.19 (1H, m, CHCH<sub>3</sub>), 4.07-3.99 (1H, m, CHCH(CH<sub>3</sub>)<sub>2</sub>), 3.83-3.78 (2H, m,

NHCH<sub>2</sub>), 3.33-3.08 (2H, m, CHCH<sub>2</sub>Ph), 3.13-2.85 (2H, m, 4-H<sub>2</sub>), 2.09-2.03 (1H, m, CH(CH<sub>3</sub>)<sub>2</sub>), 1.40-1.35 (12H, m, Boc-H, CHCH<sub>3</sub>), 0.98-0.89 (6H, m, CH(CH<sub>3</sub>)<sub>2</sub>); <sup>13</sup>C NMR (126 MHz, CD<sub>3</sub>OD) δ 178.0, 173.4, 171.7, 164.6, 150.5, 145.5, 145.4, 137.6, 128.7, 128.6, 126.3, 123.0, 119.4, 114.9, 114.1, 79.3, 60.5, 59.1, 56.6, 56.3, 51.8, 48.7, 37.2, 37.1, 29.8, 27.2, 24.8, 17.8, 15.6. *m/z* [ES+] 656 ([M+H]<sup>+</sup>, 100%); *m/z* [HRMS ES+] found [M+H]<sup>+</sup> 656.3291. [C<sub>33</sub>H<sub>45</sub>N<sub>5</sub>O<sub>9</sub>+H]<sup>+</sup> requires 656.3301.

## 6. Molecular Docking Figures

Substrates for docking were energy minimized using ChemDraw Professional 16.0 (PerkinElmer). AutoDockTools (Scripps) was used to define rotatable bonds in ligands and to prepare pdbqt files for docking. Docking was performed using AutoDock Vina (Scripps). Docking of wild-type *Cn*TYR was performed using the crystal structure of *Bm*TYR (PDB code: 3NPY) as a template. A box size of (50, 54, 46) was used with a box centre of (21.4, 15.4, 9.4).

Protein structures and docking results were visualised using UCSF Chimera 1.15rc.

One of the possible models was shown in Figure S1.

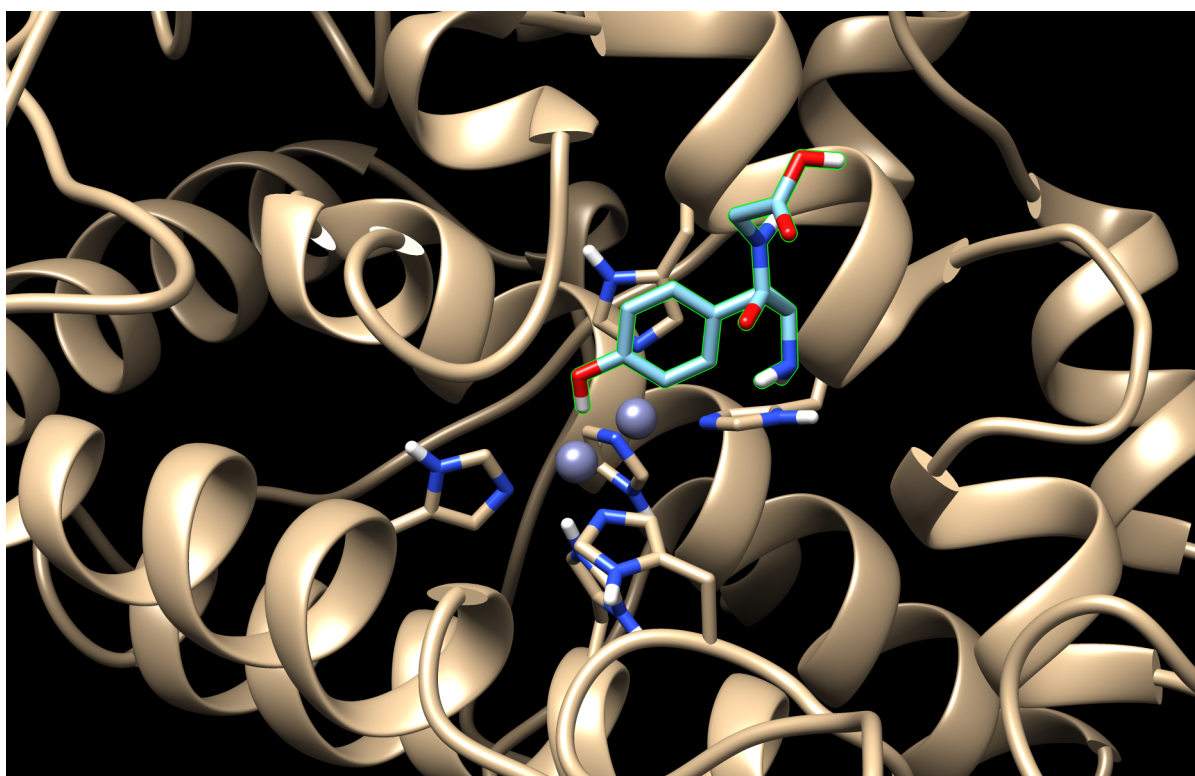

Figure S1. Molecular docking of dipeptide **2b** in a productive conformation with *Cn*TYR using Autodock Viva.

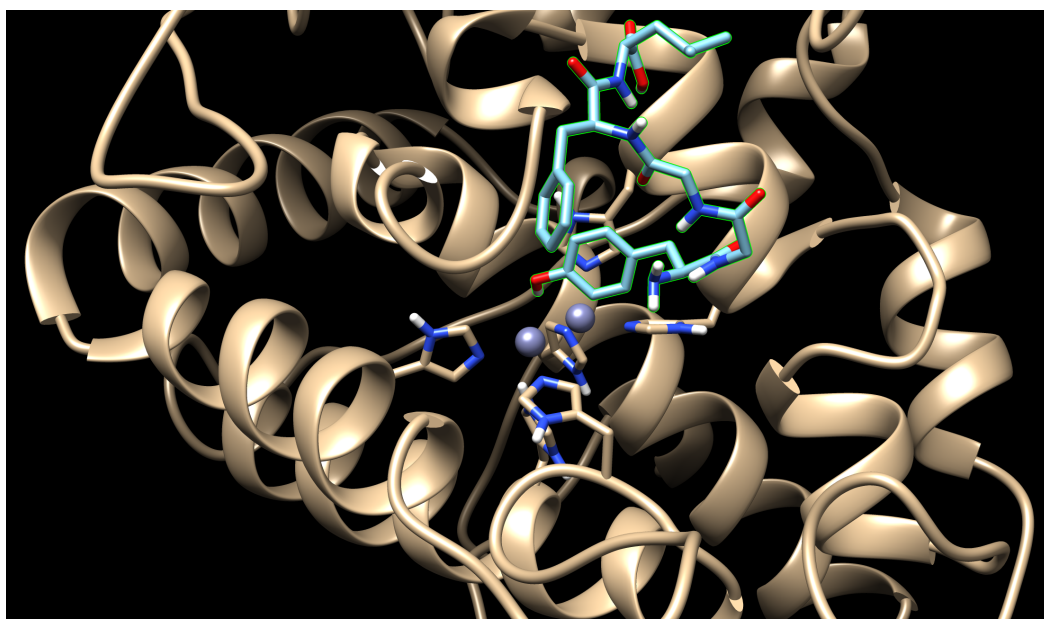

Figure S2. Molecular docking of pentapeptide **2c** in a productive conformation with *CnTYR* using Autodock Viva.

## 7. Abbreviations

|       |                                                                                            |
|-------|--------------------------------------------------------------------------------------------|
| DIPEA | <i>N,N</i> -Diisopropylethylamine                                                          |
| DMF   | Dimethylformamide                                                                          |
| DMSO  | Dimethyl sulfoxide                                                                         |
| DOPA  | 3,4-Dihydroxyphenylalanine                                                                 |
| EDC   | <i>N</i> -(3-Dimethylaminopropyl)- <i>N'</i> -ethylcarbodiimide hydrochloride              |
| EtOAc | Ethyl acetate                                                                              |
| HBTU  | <i>O</i> -(Benzotriazol-1-yl)- <i>N,N,N',N'</i> -tetramethyluronium<br>hexafluorophosphate |
| HEPES | 4-(2-hydroxyethyl)-1-piperazineethanesulfonic acid                                         |
| HOBT  | 1-Hydroxybenzotriazol hydrate                                                              |
| HPLC  | High-performance liquid chromatography                                                     |
| LCMS  | Liquid chromatography–mass spectrometry                                                    |
| Mp    | Melting point                                                                              |
| NMR   | Nuclear magnetic resonance                                                                 |
| PSR   | Pictet-Spengler reaction                                                                   |
| TFA   | Trifluoroacetic acid                                                                       |
| THF   | Tetrahydrofuran                                                                            |
| TLC   | Thin layer chromatography                                                                  |
| TYR   | Tyrosinase                                                                                 |
| UV    | Ultraviolet                                                                                |

## 8. References

1. Y. Wang, N. Tappertzhofen, D. Méndez-Sánchez, M. Bawn, B. Lyu, J. M. Ward and H. C. Hailes, *Angew. Chem., Int. Ed.*, 2019, **58**, 10120-10125.
2. M. N. Moller, D. M. Hatch, H. Y. Kim and N. A. Porter, *J. Am. Chem. Soc.*, 2012, **134**, 16773-16780.
3. G. Giorgioni, F. Claudi, S. Ruggieri, M. Ricciutelli, G. F. Palmieri, A. Di Stefano, P. Sozio, L. S. Cerasa, A. Chiavaroli, C. Ferrante, G. Orlando and R. A. Glennon, *Bioorg. Med. Chem.*, 2010, **18**, 1834-1843.
4. O. Arnaud, A. Koubeissi, L. Ettouati, R. Terreux, G. Alame, C. Grenot, C. Dumontet, A. Di Pietro, J. Paris and P. Falson, *J. Med. Chem.*, 2010, **53**, 6720-6729.
5. D. E. Scott, M. D. Aloisio, J. F. Rodriguez, M. Morimoto, R. J. Hamilton, O. Brown, R. R. Tykwinski and J. M. Stryker, *Adv. Synth. Catal.*, 2021, **363**, 4720-4727.
6. D. J. Lippincott, P. J. Trejo-Soto, F. Gallou and B. H. Lipshutz, *Org. Lett.*, 2018, **20**, 5094-5097.
